# Supplementary material for: Aurora Borealis (Bora), Which Promotes Plk1 Activation by Aurora A, Has an Oncogenic Role in Ovarian Cancer
Source: Cancers (Basel). 2020 Apr 6;12(4):886. doi: 10.3390/cancers12040886 (PMC7226261; doi:10.3390/cancers12040886)
Supplement: Supplementary file 1 [file cancers-12-00886-s001.pdf]

# **Supplementary Materials: *Aurora Borealis* (Bora), Which Promotes Plk1 Activation by Aurora A, Has an Oncogenic Role in Ovarian Cancer**

Alfonso Parrilla, Marta Barber, Blanca Majem, Josep Castellví, Juan Morote, José Luis Sánchez, Asunción Pérez-Benavente, Miguel F. Segura, Antonio Gil-Moreno and Anna Santamaria

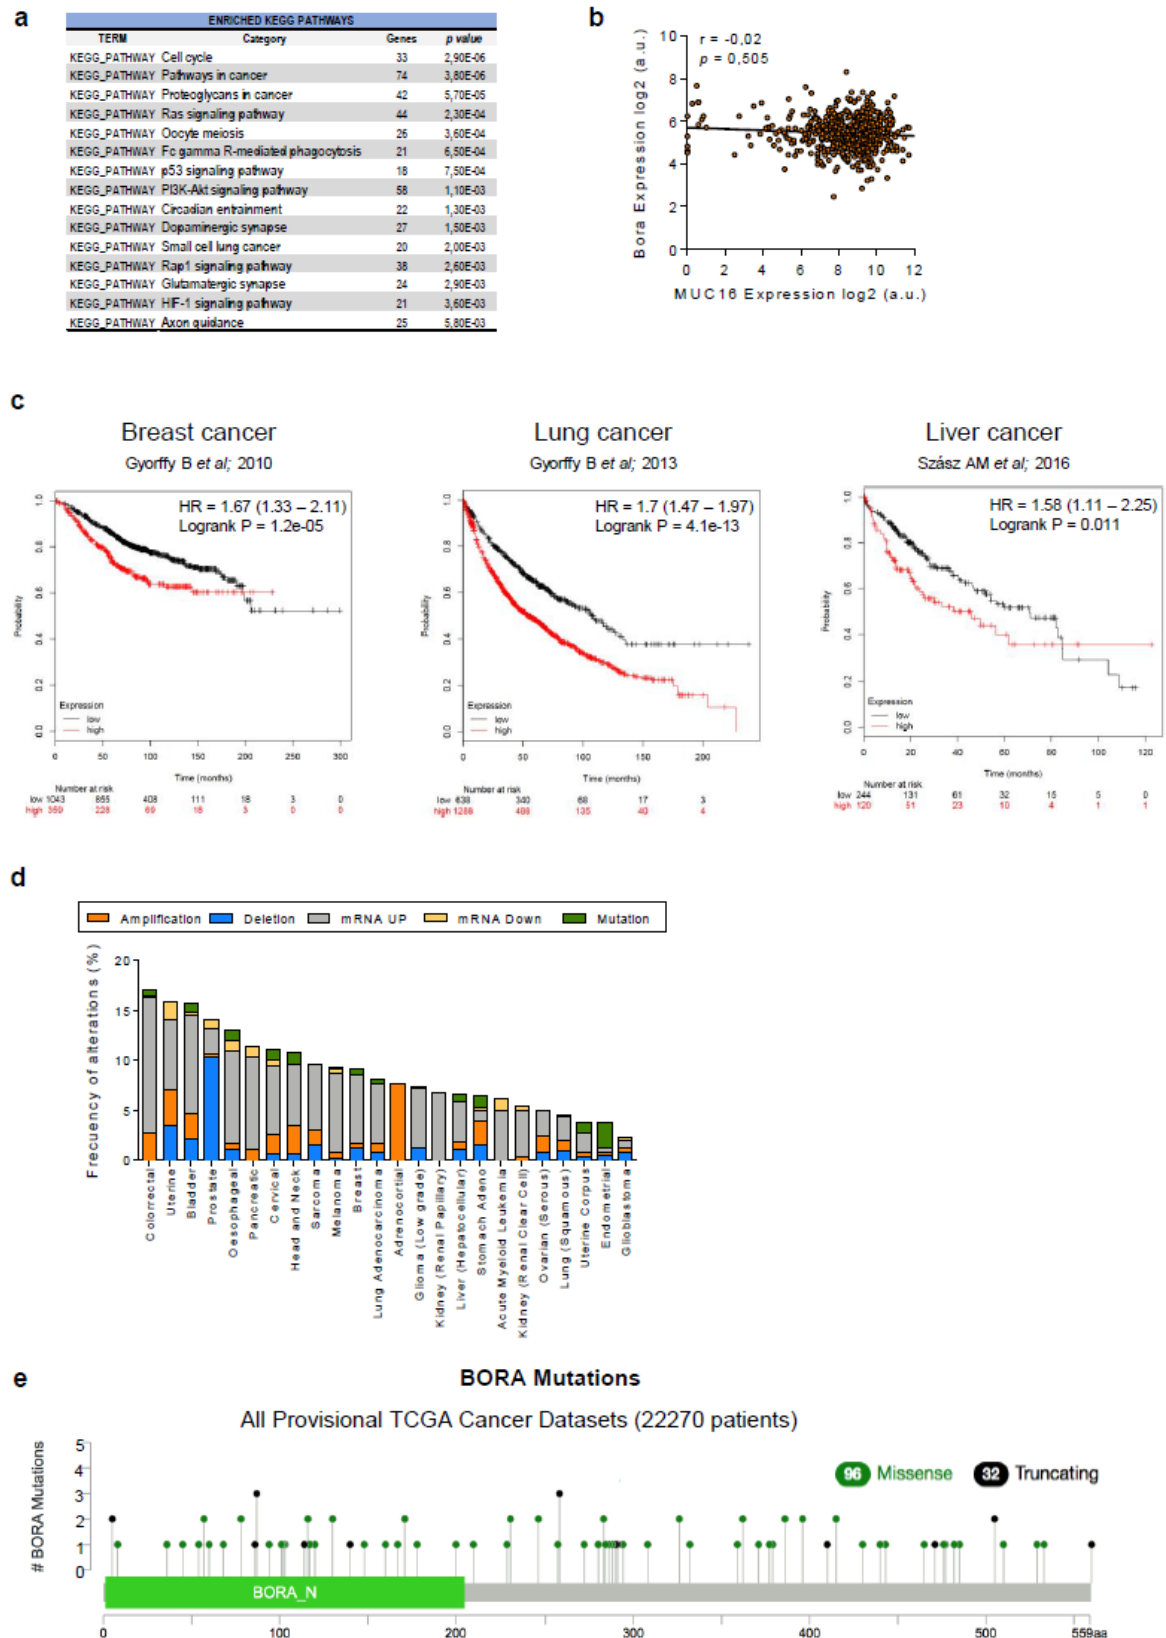

**Figure S1.** BORA expression is linked to poor prognosis (a) Functional annotation of differentially expressed genes as reported by DAVID Bioinformatics 6.8. Enriched KEGG pathways using all differentially expressed genes were plotted. (b) Correlation between BORA and *MUC16* expression levels (CA-125 antigen) using the ovarian TCGA cohort. (c) Kaplan–Meier survival analysis based on the expression levels of BORA in breast, lung and liver carcinomas. *P*-values were estimated using a log-rank test to determine the difference in outcomes between patients with higher BORA expression

levels (red) *versus* those with lower/no levels (black). **(d)** Frequency (%) of BORA mutations and/or copy number alterations (deletions or amplifications) across the spectrum of human cancers currently annotated in the TCGA provisional **(e)** Histogram of BORA protein showing the mutational profile across the length of the protein. Data were retrieved from the TCGA databases using the cBioPortal website.

| Cell Division | Mitotic process | Correlation with Survival: Worse if (p-value) | Ovarian cancer related function |                            |
|---------------|-----------------|-----------------------------------------------|---------------------------------|----------------------------|
| SPC25         | +               | High (0.0006)                                 | +                               |                            |
| BORA          | +               | High (0.0216)                                 | +                               |                            |
| CDCA5         | +               | High (0.0069)                                 | +                               |                            |
| CCNA          | +               | High (0.0199)                                 | +                               |                            |
| FAM64A        | +               | High (0.0137)                                 | +                               |                            |
| KIF20B        | +               | High (0.0007)                                 | +                               |                            |
| OPI5          | +               | High (0.0337)                                 | +                               |                            |
| SPC24         | +               | High (1.1e-5)                                 | +                               |                            |
| ARF6          | -               | Low (0.0259)                                  | -                               | Broner et al., 2017        |
| BUB1B         | +               | High (0.0007)                                 | -                               | Sun et al., 2017           |
| BUB1          | +               | High (0.0029)                                 | -                               | Sun et al., 2017           |
| CKS1B         | -               | High (0.0002)                                 | -                               | Kawahara et al., 2017      |
| CKS2          | -               | High (0.0046)                                 | +                               |                            |
| CABLES1       | -               | High (0.0322)                                 | -                               | Sakamoto et al., 2008      |
| ERCC6L        | -               | High (0.2838)                                 | +                               |                            |
| NEK2          | +               | High (0.0463)                                 | -                               | Liu et al., 2014           |
| NUF2          | +               | High (2.9e-5)                                 | -                               | Sethi et al., 2012         |
| ARHGEF2       | +               | Low (0.0501)                                  | +                               |                            |
| SAC3D1        | +               | High (0.2219)                                 | +                               |                            |
| TPX2          | +               | High (0.0013)                                 | -                               | Tian et al., 2018          |
| ZWINT         | -               | High (0.0021)                                 | -                               | Xu et al., 2016            |
| AURKA         | +               | High (9.6e-6)                                 | -                               | Chiba et al., 2017         |
| BIRC5         | +               | High (0.1289)                                 | -                               | Wang et al., 2018          |
| CDC20         | +               | High (0.0745)                                 | -                               | Gayyed et al., 2016        |
| CDC25A        | +               | High (0.0117)                                 | -                               | Brogini et al., 2000       |
| CDC25C        | +               | High (0.2129)                                 | -                               | Gao et al., 2018           |
| CDC6          | +               | High (0.1469)                                 | -                               | Deng et al., 2016          |
| CDC7          | -               | High (0.1324)                                 | -                               | Kulkarni et al., 2009      |
| CDCA3         | +               | High (4.5e-5)                                 | -                               | Itzel et al., 2015         |
| CDCA8         | -               | High (0.2284)                                 | -                               | Wrzeszczynski et al., 2011 |
| CENPE         | -               | High (0.0052)                                 | -                               | Chong et al., 2018         |
| CENPF         | +               | High (3.5e-5)                                 | -                               | Xu et al., 2016            |
| CCNB1         | -               | High (1.1e-9)                                 | -                               | Ye et al., 2015            |
| CCNB2         | +               | High (0.0488)                                 | -                               | Fridley et al., 2018       |
| CCNB3         | -               | High (0.0193)                                 | +                               |                            |
| CCNE1         | -               | High (0.001)                                  | -                               | Ayhan et al., 2017         |
| CCNE2         | -               | High (0.0005)                                 | -                               | Xie et al., 2017           |
| CCNY          | -               | High (0.1277)                                 | -                               | Liu et al., 2016           |
| CDK1          | +               | High (0.0006)                                 | -                               | Yang et al., 2016          |
| FAM83D        | +               | High (8.1e-6)                                 | -                               | Ramakrishna et al., 2010   |
| HMGA2         | +               | High (0.0364)                                 | -                               | Wu et al., 2011            |
| KIF11         | +               | High (0.0016)                                 | -                               | Xu et al., 2016            |
| KIF14         | -               | High (2.5e-5)                                 | -                               | Qiu et al., 2017           |
| KIF18B        | -               | High (0.0132)                                 | -                               | Itzel et al., 2015         |
| KIF2C         | +               | High (0.0377)                                 | -                               | Zhao et al., 2014          |
| KIFC1         | -               | High (0.0104)                                 | -                               | Mittal et al., 2016        |
| NCAPG         | -               | High (0.0022)                                 | +                               |                            |
| HNCAPH        | -               | High (0.0172)                                 | +                               |                            |
| PTTG1         | -               | High (0.0498)                                 | -                               | Nakachi et al., 2016       |
| PSRC1         | -               | High (0.0221)                                 | +                               |                            |
| RCC2          | -               | High (1.4e-5)                                 | -                               | Wu et al., 2018            |
| SETP11        | -               | High (0.0433)                                 | +                               |                            |
| SPAG5         | -               | High (0.0009)                                 | +                               |                            |
| SMC1A         | -               | High (0.0443)                                 | -                               | Liu et al., 2014           |
| TIMELESS      | +               | Low (0.0165)                                  | -                               | Jim et al., 2015           |

**Figure S2. Integrative computational analysis reveals druggable mitotic proteins to explore in OC.** (a) Genes listed according to the different filters. The “+” and “-” symbols refer to (1) included or not in the mitotic process GO term or (2) if the gene or protein –function in OC is reported or not in the literature. High and low refers to the gene expression correlated with worse survival outcome. Survival analysis were carried out using the Kaplan Meier Plotter platform. References for those genes analyzed.

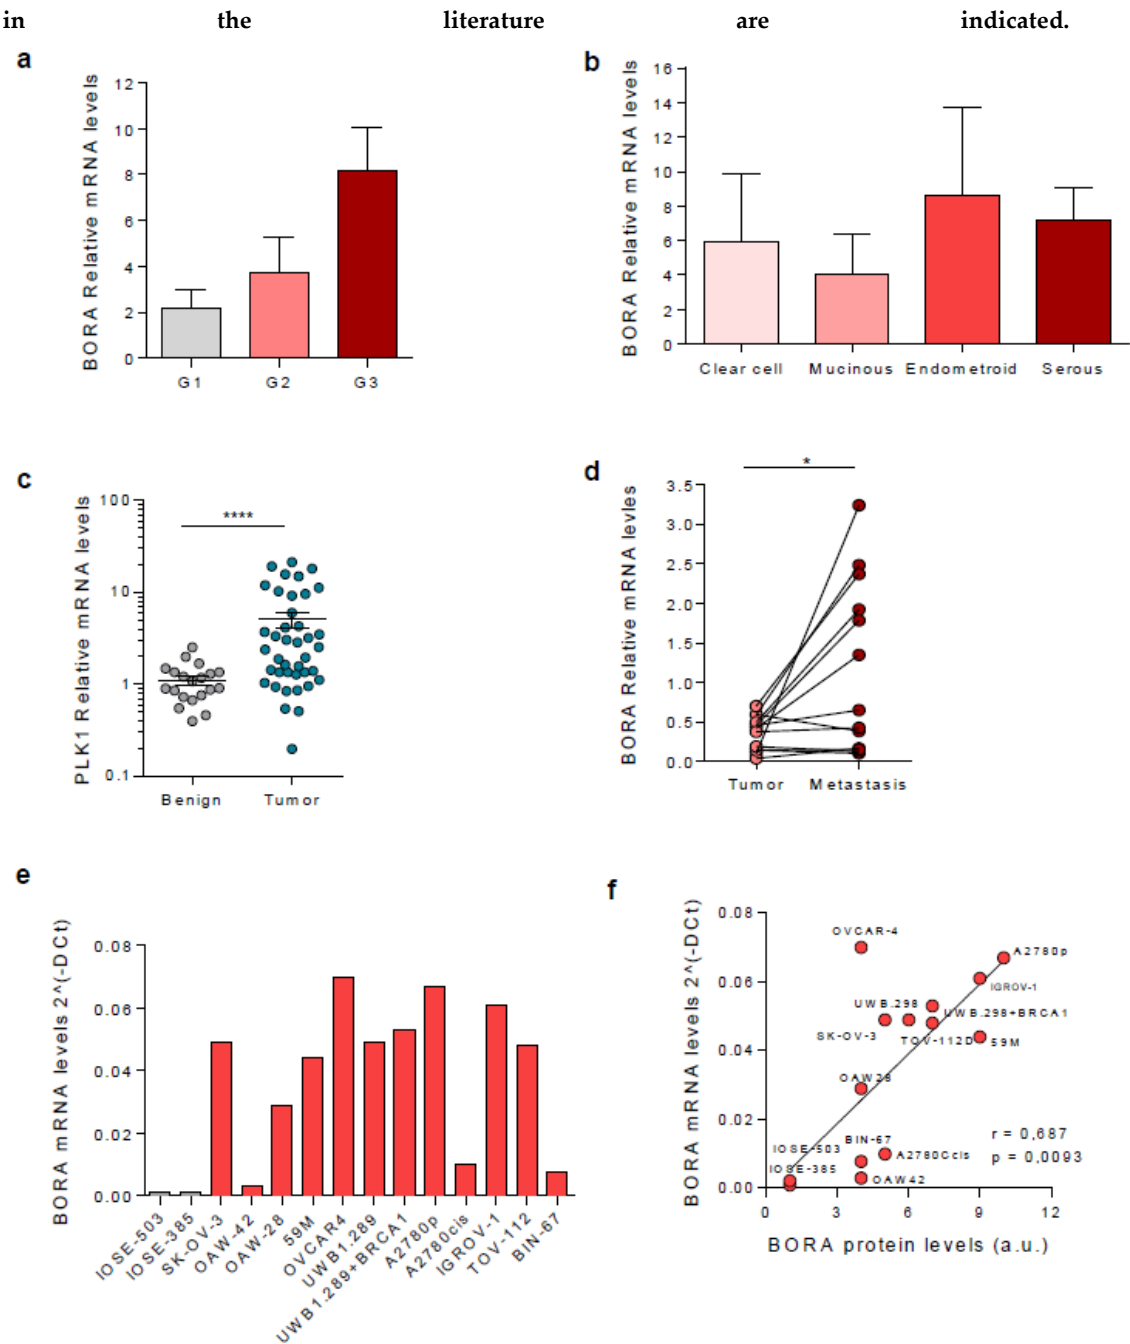

**Figure S3. BORA expression in human samples and ovarian cell lines.** (a-b) BORA relative mRNA levels from tumor samples (n=40) categorized by the neoplasm grade and the histological OC subtypes. (c) PLK1 mRNA expression levels in the collection of ovarian samples (d) Graph represents BORA relative expression of the primary ovarian tumoral tissue to its paired metastatic sample. MRNA expression levels of each sample were normalized to its respective levels of GAPDH expression. The relative fold-change in expression was determined by the comparative 2<sup>-ΔΔCt</sup>

method and normalized against *BORA* expression value from the primary tumor. **(f)** mRNA levels of *BORA* in the spectrum of ovarian cell lines. **(g)** Correlation (Spearman) between *BORA* mRNA and protein levels in the ovarian cell lines. In (c) and (e), *P*-values were calculated using unpaired Student's *t*-test. \*\*\**p*<0,001.

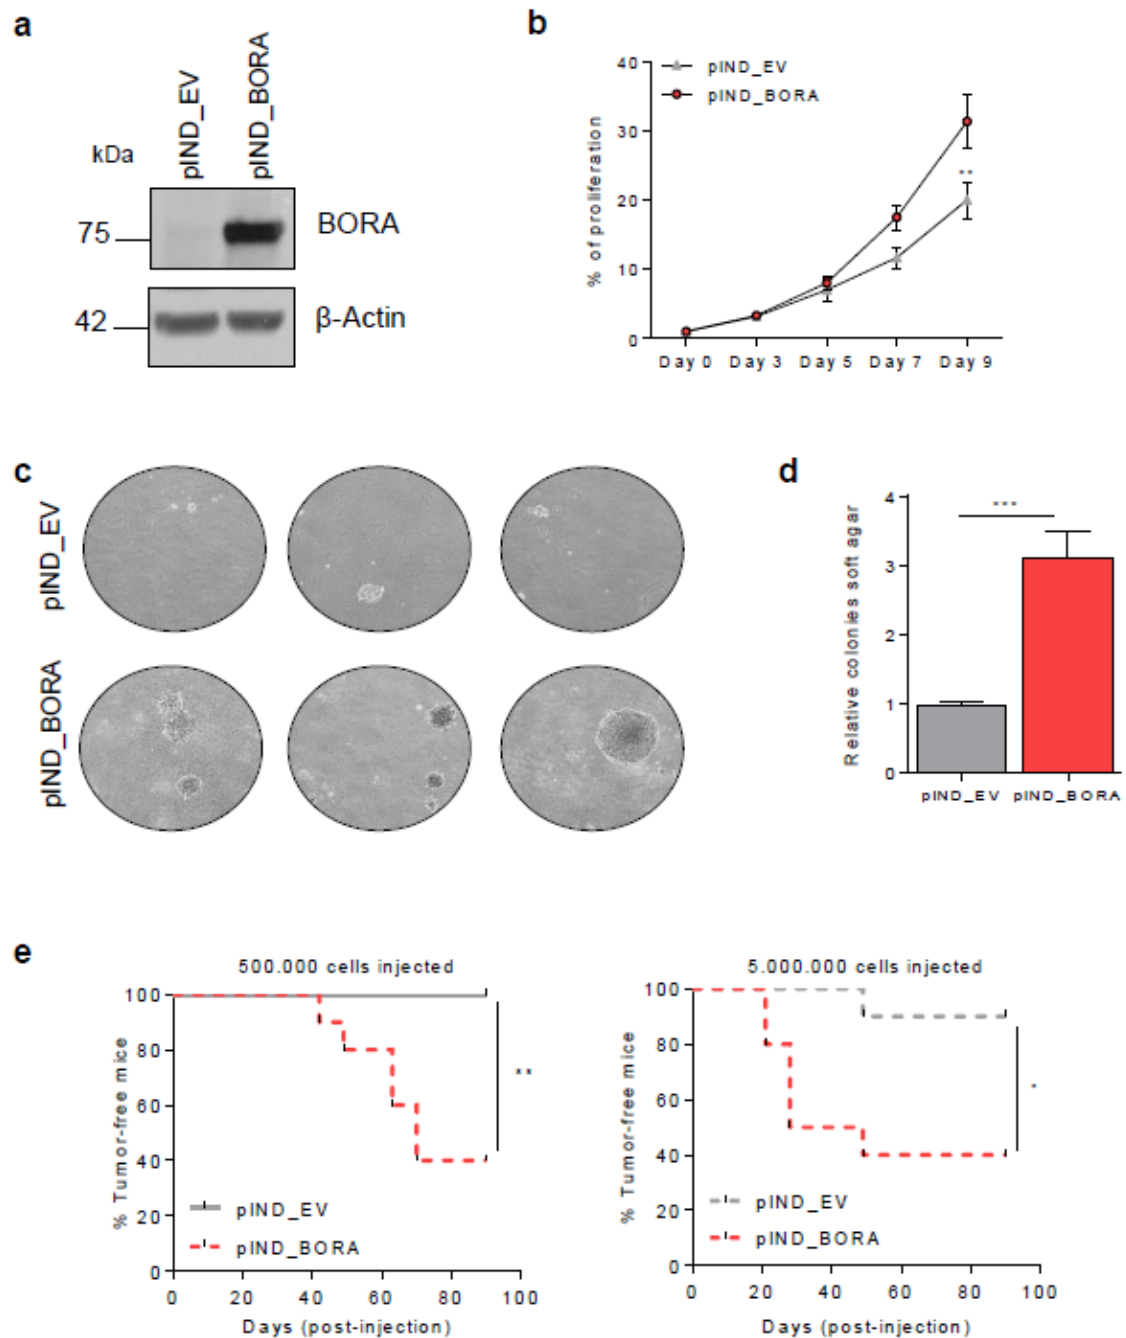

**Figure 4. BORA overexpression enhances the tumoral aggressiveness status in the SK-OV-3 cell line.** **(a)** Immunoblot showing BORA overexpression in the EV- and BORA-SK-OV-3-transduced cells upon doxycycline administration (0,25 µg/mL). β-Actin was used as loading control. **(b-d)** Average quantification of proliferation and capacity to growth in soft agar conditions. Graph represent mean ± SEM of at least three independent experiments. *P*-values were calculated using unpaired Student's *t*-test. \*\**P*<0,01; \*\*\**P*<0,001. **(e)** Diffuse tissue engraftment appearance in the flank of the mice depicted in a graph after subcutaneous injection of pIND\_EV- and pIND\_BORA- IOSE transduced cells into the flank of the mice. Two approaches were followed: one injecting 5·10<sup>5</sup> cells and other with 5·10<sup>6</sup> cells. *p*-values were estimated using a log-rank test to determine the difference in appearance between pIND\_EV tumors (grey line) vs pIND\_BORA tumors (red line). \**p*<0,05; \*\**p*<0,01.

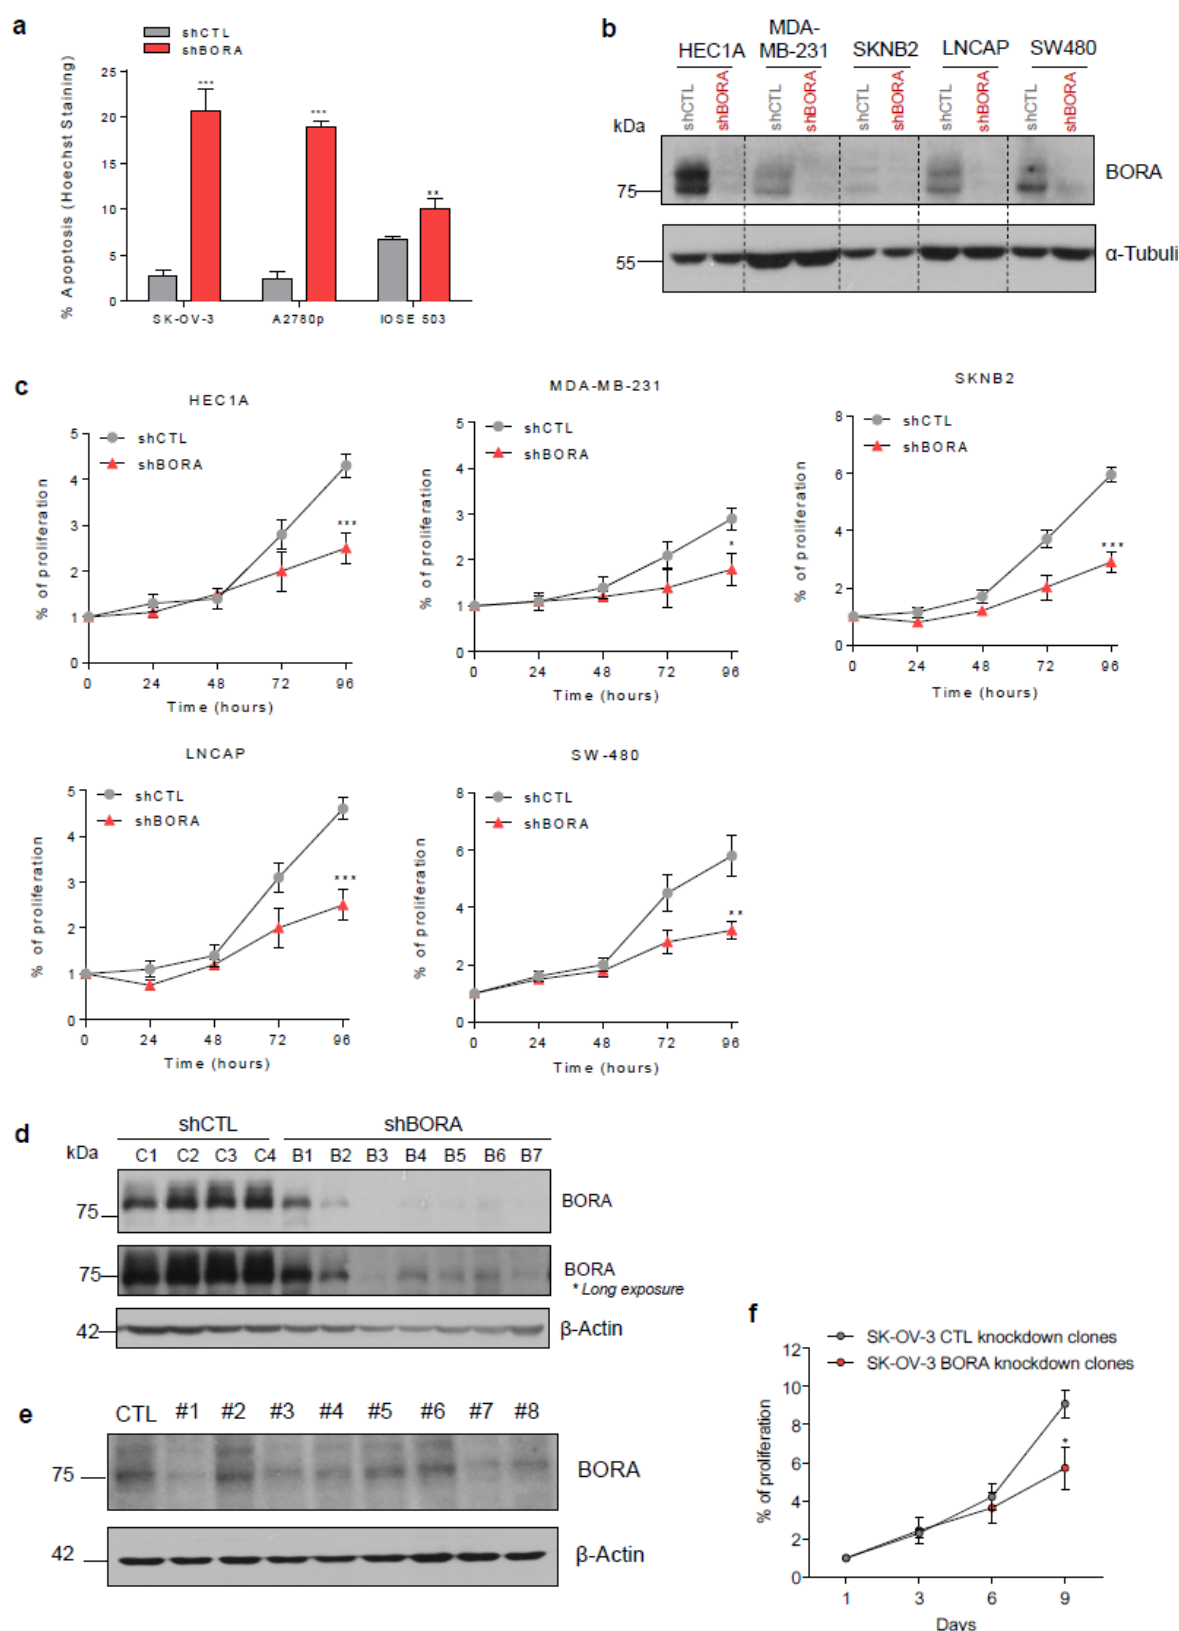

**Figure 5. BORA is essential to OC viability.** (a) Average quantification of cell death assays in SK-OV-3, A2780p and IOSE cells at 96h post lentiviral transduction. Graphs represent mean  $\pm$  SEM of three independent experiments (b) Representative immunoblot of BORA knockdown in endometrial, breast, neuroblastoma, prostate and colon carcinoma cell lines.  $\alpha$ -Tubulin was used as loading control. (c) Normalized proliferation curve of shCTL (grey line) and

shBORA (red line) -transduced cells in the different tumor cell lines. **(d)** Immunoblot analysis of BORA in control- and BORA- depleted A2780p clones. **(e)** Immunoblot of different SK-OV-3 CRISPR/cas9 clones and **(f)** proliferative curves of some of these clones.  $\beta$ -Actin was used as loading control. Graphs represent mean  $\pm$  SEM of three independent experiments. In C and F,  $P$ -values were calculated using unpaired Student's  $t$ -test. \* $p < 0,05$ ; \*\* $p < 0,01$ ; \*\*\* $p < 0,001$ .

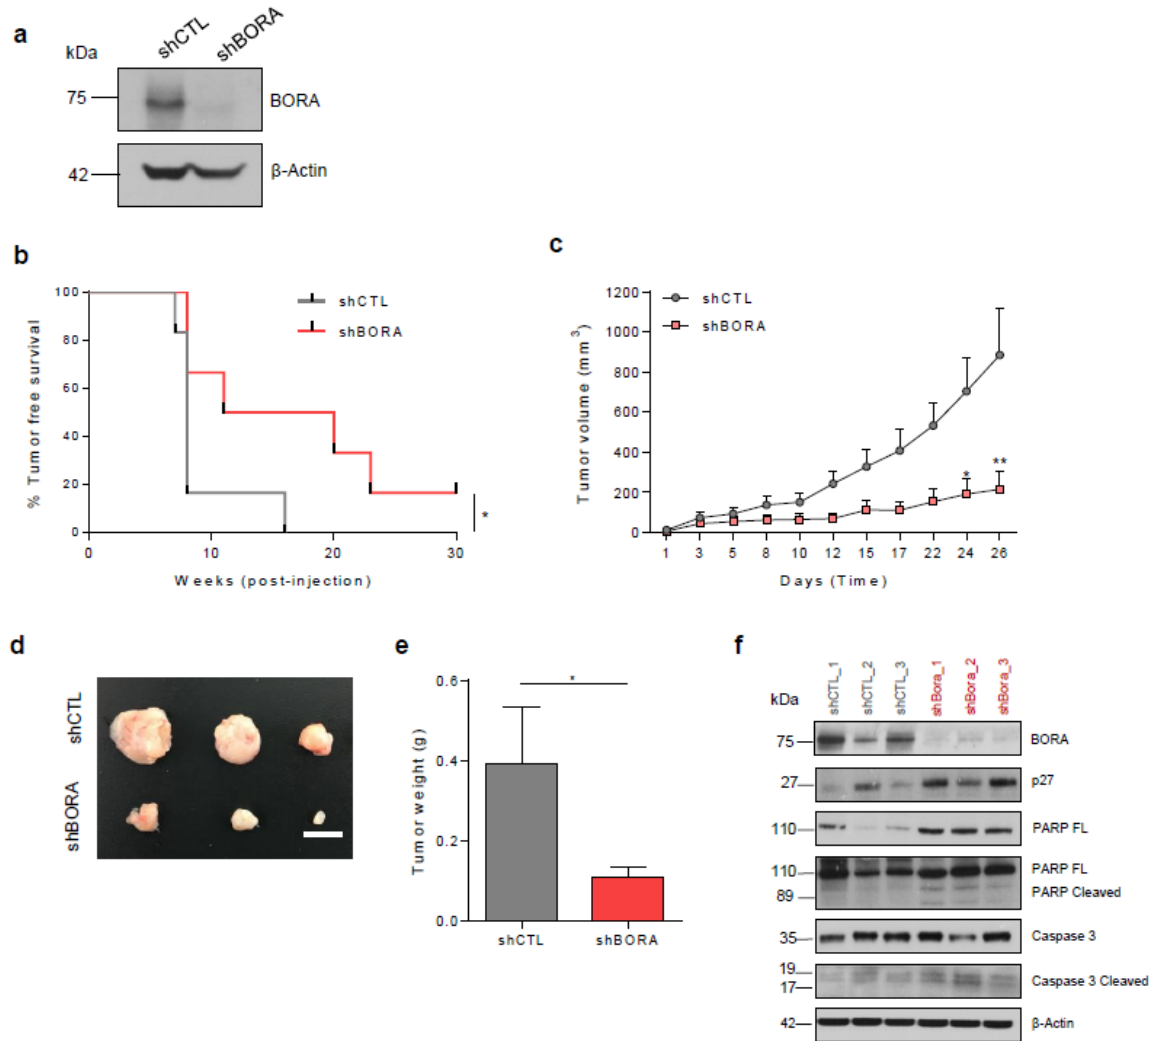

**Figure S6.** BORA impacts on tumor engraftment. **(a)** A portion of shCTL and shBORA transduced cells used for the *in vivo* model were analyzed by immunoblot showing BORA downregulation.  $\beta$ -Actin was used as loading control. **(b)** Tumor engraftment incidence.  $P$ -value was estimated using a log-rank test to determine the difference in appearance between shCTL tumors (grey line) *vs* shBORA tumors (red line). \* $P < 0,05$ . **(c)** Tumor volume was monitored over time using electronic caliper. Two-way ANOVA was used to calculate the significance of the difference between shCTL (grey line) and shBORA tumors (red line). \* $P < 0,05$ ; \*\* $P < 0,01$ . **(d)** Macroscopic images of resected tumors at end-point. Bar: 1 cm. **(e)** Average weight of the tumors taken at the time of the resection.  $P$ -value was calculated using a two-tailed Student's  $t$ -test. \* $P < 0,05$ . **(f)** Immunoblot analysis of BORA, p27, PARP and Caspase 3 protein markers using protein lysates from representative xenografts from both experimental groups.  $\beta$ -Actin.

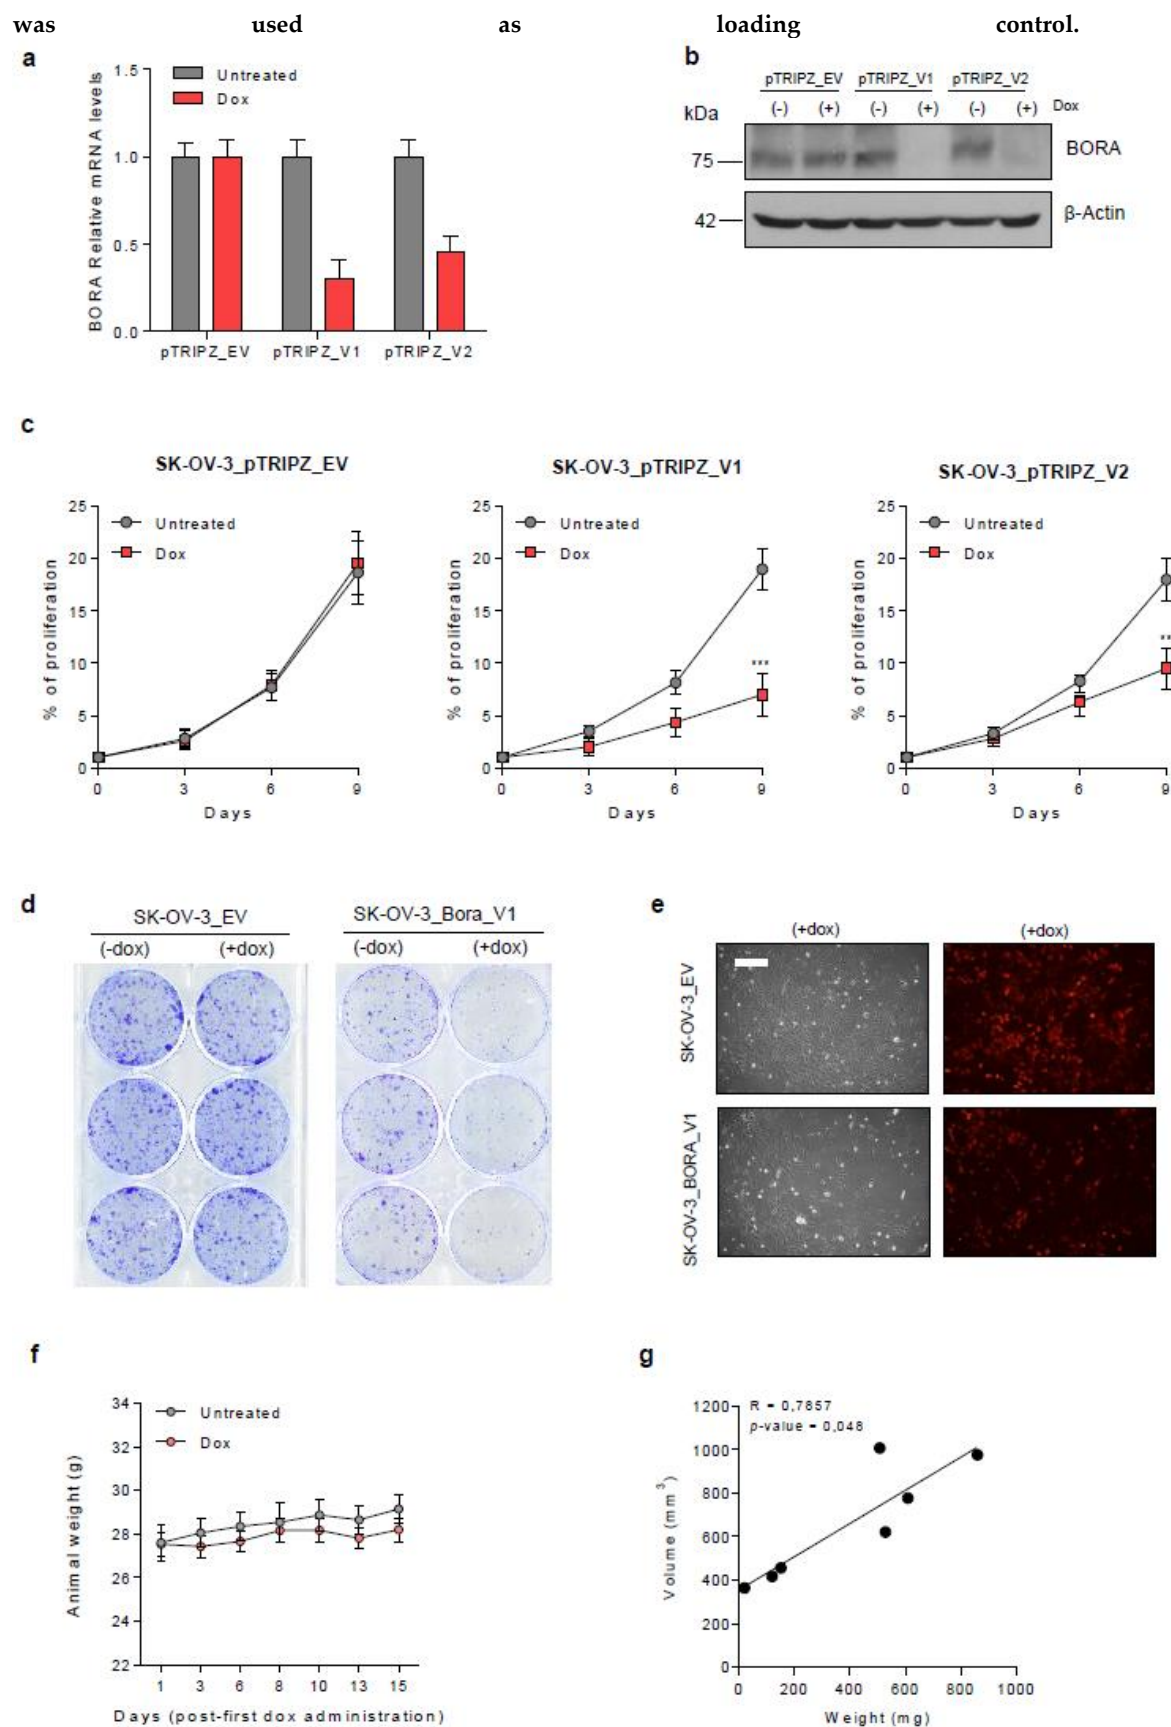

**Figure S7.** BORA depletion using an inducible system impairs proliferation and colony formation capacities. (a) Relative expression of BORA levels analyzed by RT-qPCR in the different stable pTRIPZ transduced SK-OV-3 cells upon doxycycline administration (1  $\mu$ g/mL). *GAPDH* was used as endogenous control. The relative fold-change in expression was determined by the comparative 2(-

$\Delta\Delta Ct$ ) method and normalized against control (untreated) expression value. **(b)** Immunoblot showing effective BORA inducible depletion upon doxycycline treatment. **(c)** Proliferation time course comparing pTRIPZ\_EV or pTRIPZ\_BORAV1 or pTRIPZ\_BORAV2 treated or untreated with 1  $\mu\text{g/mL}$  of doxycycline. *P*-value was calculated using a two-tailed Student's *t*-test. \*\**P*<0,01; \*\*\**P*<0,001. **(d)** Representative images of a colony formation assay with pTRIPZ\_EV and pTRIPZ\_BORAV1 transduced cells treated with or without doxycycline and allowed to grow for 10-12 days. **(e)** Representative images of pTRIPZ- EV and pTRIPZ\_BORA V1– SK-O-3 infected cells. Expression of the pTRIPZ vector is followed by the expression of TurboRFP protein. **(f)** Spearman correlation between volume and weight of shBORA-depleted tumors. **(g)** Animal weight of untreated and doxycycline treated-animals during the consecution of the experiment, indicating a good doxycycline tolerability in treated-mice. Graphs represent mean  $\pm$  SEM of three independent experiments.

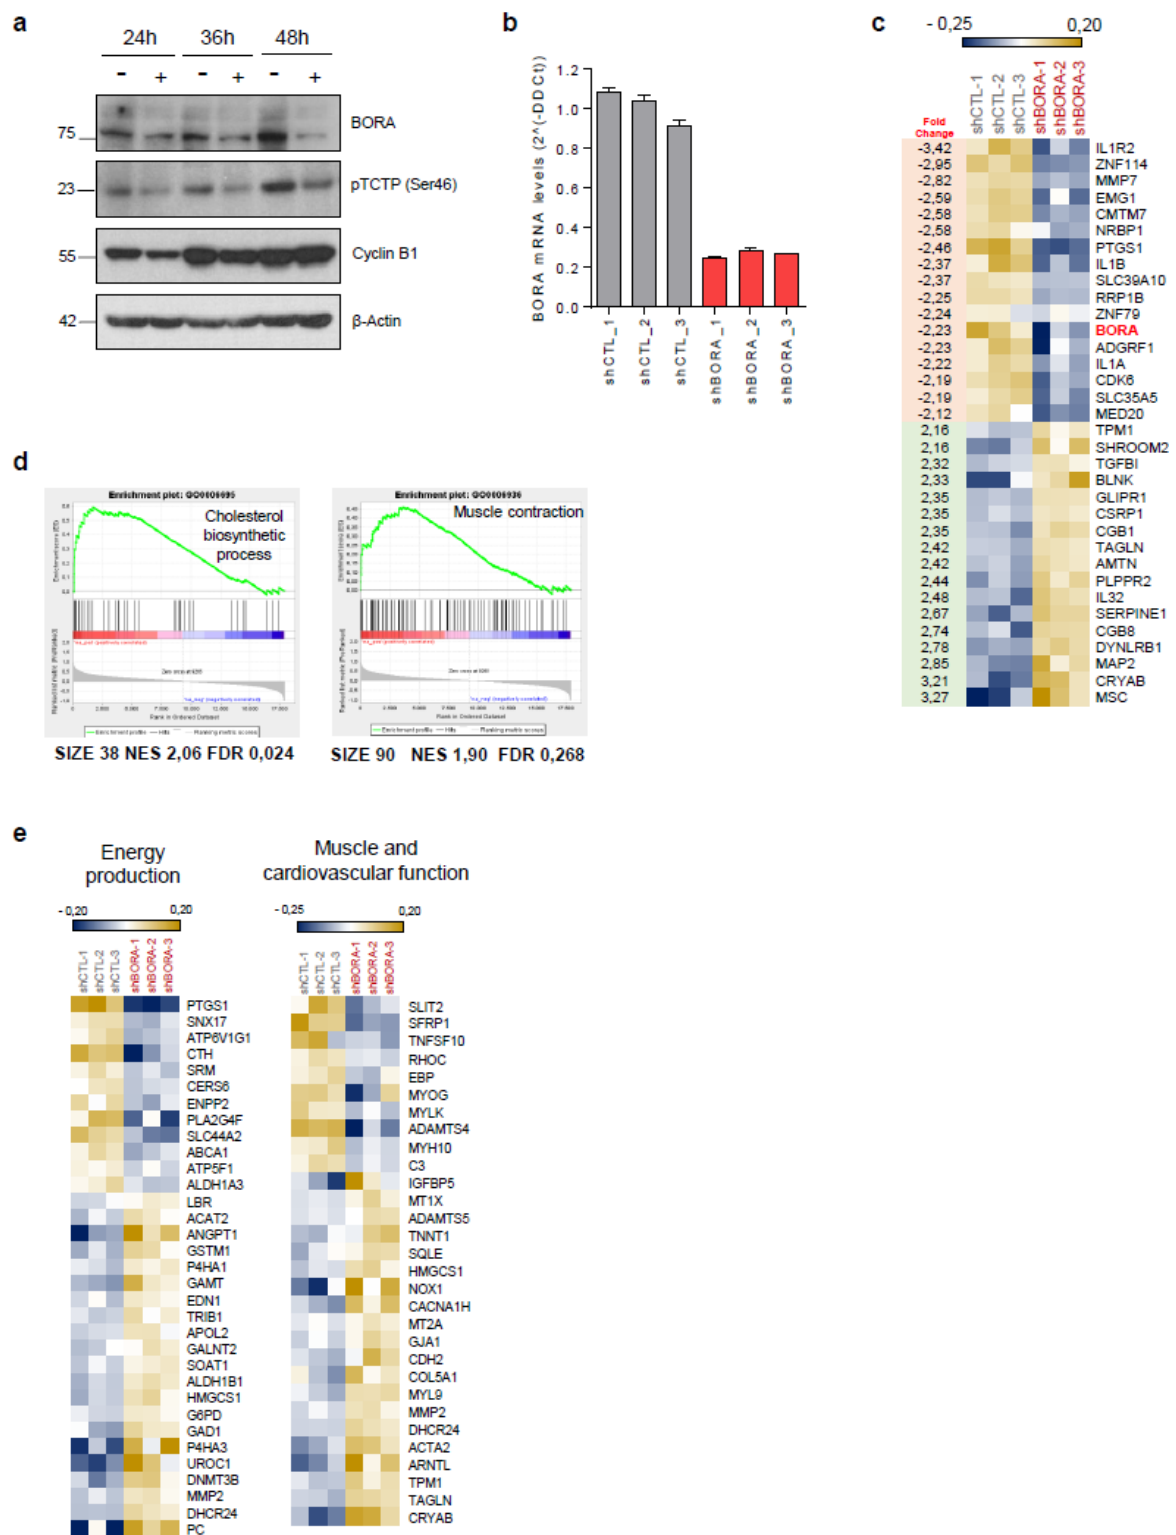

**Figure S8. BORA alters the expression of genes involved in energy production and muscle and cardiovascular processes.** (a) Time course immunoblot of BORA, Cyclin B1 and pTCTP (Ser46) to select the best time to deplete BORA and see the causes of the depletion more than the consequences.  $\beta$ -Actin used as loading control. (b) BORA mRNA levels performed in the samples used to the microarray analysis. *GAPDH* was used as endogenous control. (c) Representative genes with the highest fold change variation upon BORA depletion. (d-e) Enrichment plots and heat maps showing the transcriptomic impact of BORA silencing in genes involved in energy production and muscle and cardiovascular functions. The color key shows relative expression levels of the differentially expressed

genes (yellow corresponds to overexpressed genes while blue corresponds to underexpressed genes).

98

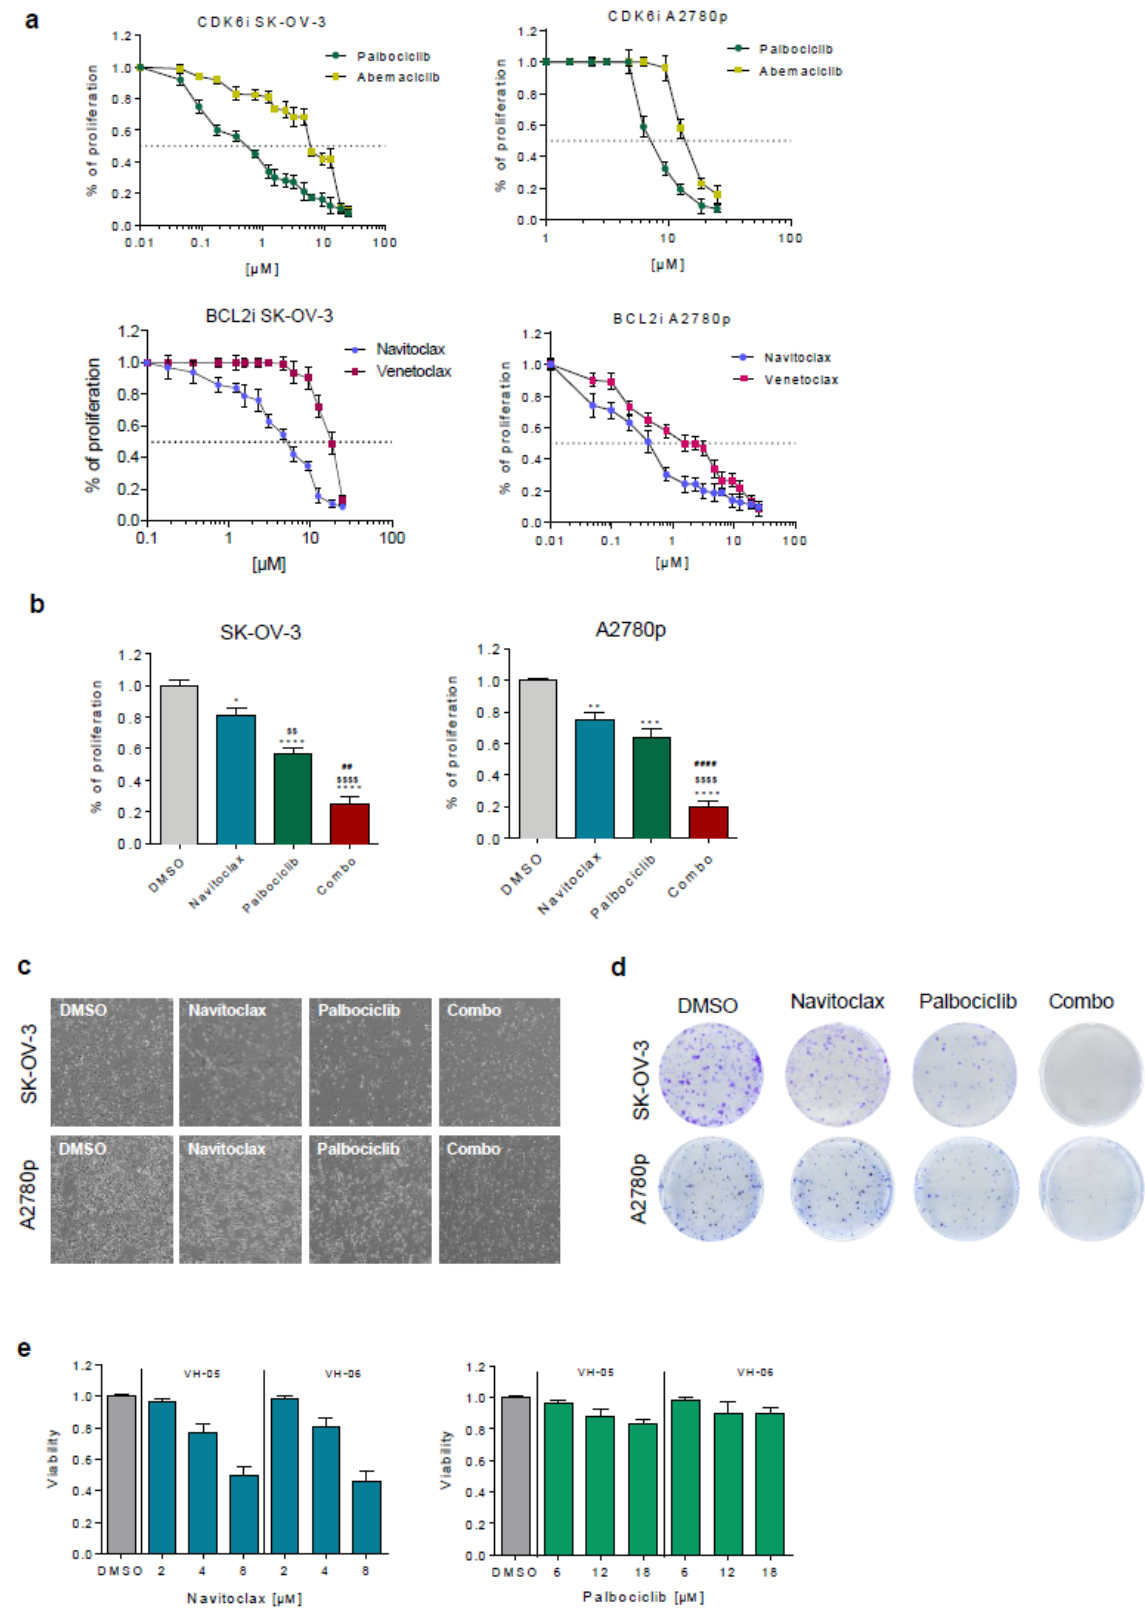

**Figure S9.** BCL-2 and CDK6 inhibitors reduce the proliferative capacity of OC cells. (a) Normalized proliferation curves of the indicated OC cell lines treated with CDK6 inhibitors: Palbociclib and Abemaciclib and BCL-2 inhibitors: Venetoclax and Navitoclax for 5 days. Drug doses ranges from

0,01  $\mu$ M to 25  $\mu$ M. Data represent an average quantification of three independent experiments  $\pm$  SEM (n=6/condition). **(b)** Proliferation assay of the indicated cell lines treated with the two agents at the best CI for five days, measured by crystal violet staining (n=6/condition). Graphs are the average of three independent experiment  $\pm$  SEM. *P*-value was calculated using One-way ANOVA. \* compares DMSO *versus* the rest of the conditions; # *Navitoclax versus* rest of conditions; \$ *Palbociclib versus* Combo. \*,#,\$*P*<0,05; \*\*,##,\$\$*P*<0,01; \*\*\*,###,\$\$\$*P*<0,01; \*\*\*\*,####,\$\$\$\$*P*<0,001 **(c)** Representative macroscopic images of SK-OV-3 and A2780p cells lines treated with the inhibitors as in (b). Bar: 100  $\mu$ m **(d)** Colony formation capacity of the indicated cells lines treated with the two compounds alone and in combination. **(e)** MTS assay with different suboptimal drug concentrations of Palbociclib and Navitoclax tested in the two patient-derived tumoral cells grown in 3D

**Table S1.** Data sets, bioinformatic tools and techniques used in this study, with the corresponding references.

| Dataset              | Number of samples | Type     | Status | References                         | Tool                                                                                            |
|----------------------|-------------------|----------|--------|------------------------------------|-------------------------------------------------------------------------------------------------|
| GSE14407             | 24                | OC       | Public | -                                  | GEO2R                                                                                           |
| GSE26712             | 195               | OC       | Public | -                                  | GEO2R                                                                                           |
| GSE27651             | 41                | OC       | Public | -                                  | GEO2R                                                                                           |
| GSE38666             | 30                | OC       | Public | -                                  | GEO2R                                                                                           |
| GSE54388             | 22                | OC       | Public | -                                  | GEO2R                                                                                           |
| Kaplan-Meier Plotter | 1656              | OC       | Public | Gyorffy B <i>et al.</i> , (2012)   | <a href="http://kmplot.com">http://kmplot.com</a>                                               |
| Kaplan-Meier Plotter | 1402              | Breast   | Public | Gyorffy B <i>et al.</i> , (2010)   | <a href="http://kmplot.com">http://kmplot.com</a>                                               |
| Kaplan-Meier Plotter | 1926              | Lung     | Public | Gyorffy B <i>et al.</i> , (2013)   | <a href="http://kmplot.com">http://kmplot.com</a>                                               |
| Kaplan-Meier Plotter | 364               | Liver    | Public | Menyhart O <i>et al.</i> , (2018)  | <a href="http://kmplot.com">http://kmplot.com</a>                                               |
| cBioPortal           | -                 | 23 types | Public | Gao <i>et al.</i> , (2013)         | <a href="http://www.cbioportal.org/">http://www.cbioportal.org/</a>                             |
| DAVID                | -                 | -        | Public | Huang W <i>et al.</i> , (2007)     | <a href="http://david.abcc.ncifcrf.gov">http://david.abcc.ncifcrf.gov</a>                       |
| GSEA                 | -                 | -        | Public | Subramanian <i>et al.</i> , (2005) | <a href="http://www.broad.mit.edu/gsea/">http://www.broad.mit.edu/gsea/</a>                     |
| Venny diagram        | -                 | -        | Public | Oliveros, J.C. (2007-2015)         | <a href="http://bioinfogp.cnb.csic.es/tools/venny">http://bioinfogp.cnb.csic.es/tools/venny</a> |
| R2 genomics          | -                 | -        | Public | -                                  | <a href="http://r2.amc.nl">http://r2.amc.nl</a>                                                 |

#### Supplementary References

Gyorffy B, Lanczky A, Szallasi Z. Implementing an online tool for genome-wide validation of survival-associated biomarkers in ovarian-cancer using microarray data of 1287 patients, *Endocrine-Related Cancer*. 2012 Apr 10;19(2):197-208

**Table S2.** Fresh-frozen tissue samples of the ovary for mRNA analysis.

| <b>N</b> | <b>Group</b> | <b>Type</b>           | <b>FIGO stage</b> | <b>Grade</b> |
|----------|--------------|-----------------------|-------------------|--------------|
| 1        | B            | Follicular cyst       | -                 | -            |
| 2        | B            | Follicular cyst       | -                 | -            |
| 3        | B            | Follicular cyst       | -                 | -            |
| 4        | B            | Follicular cyst       | -                 | -            |
| 5        | B            | Follicular cyst       | -                 | -            |
| 6        | B            | Simple mucinous cyst. | -                 | -            |
| 7        | B            | Simple mucinous cyst. | -                 | -            |
| 8        | B            | Simple mucinous cyst. | -                 | -            |
| 9        | B            | Simple mucinous cyst. | -                 | -            |
| 10       | B            | Simple mucinous cyst. | -                 | -            |
| 11       | B            | Simple serous cyst.   | -                 | -            |
| 12       | B            | Simple serous cyst.   | -                 | -            |
| 13       | B            | Simple serous cyst.   | -                 | -            |
| 14       | B            | Simple serous cyst.   | -                 | -            |
| 15       | B            | Simple serous cyst.   | -                 | -            |
| 16       | B            | Simple serous cyst.   | -                 | -            |
| 17       | B            | Simple serous cyst.   | -                 | -            |
| 18       | B            | Fibroma               | -                 | -            |
| 19       | B            | Fibroma               | -                 | -            |
| 20       | B            | Fibroma               | -                 | -            |
| 21       | Early        | Mucinous              | IC                | 2            |
| 22       | Early        | Mucinous              | IIB               | 2            |
| 23       | Early        | Mucinous              | IA                | 2            |
| 24       | Early        | Mucinous              | IC                | 2            |
| 25       | Early        | Endometrioid          | IA                | 3            |
| 26       | Early        | Endometrioid          | IC                | 2            |
| 27       | Early        | Endometrioid          | IC                | 2            |
| 28       | Early        | Endometrioid          | IC                | 1            |
| 29       | Early        | Endometrioid          | IC2               | 1            |
| 30       | Early        | Endometrioid          | IA                | 3            |
| 31       | Early        | Clear cell            | IIB               | 3            |
| 32       | Early        | Clear cell            | IC                | 3            |
| 33       | Early        | Clear cell            | IIB               | 3            |
| 34       | Early        | Papillary serous      | IC                | 3            |
| 35       | Early        | Papillary serous      | IIA               | 3            |
| 36       | Early        | Papillary serous      | IIB               | 1            |
| 37       | Early        | Papillary serous      | IA                | 3            |
| 38       | Early        | Papillary serous      | IC1               | 3            |
| 39       | Late         | Clear cell            | IIIC              | 3            |
| 40       | Late         | Clear cell            | IIIC              | 3            |
| 41       | Late         | Not typified          | IIIC              | 2            |
| 42       | Late         | Mucinous              | IA                | -            |
| 43       | Late         | Papillary serous      | IIC               | 3            |
| 44       | Late         | Papillary serous      | IIIC              | 3            |
| 45       | Late         | Papillary serous      | IV                | 3            |
| 46       | Late         | Papillary serous      | IV                | 3            |
| 47       | Late         | Papillary serous      | IIIA              | 3            |
| 48       | Late         | Papillary serous      | IIIC              | 3            |
| 49       | Late         | Papillary serous      | -                 | 3            |
| 50       | Late         | Papillary serous      | IIIC              | 3            |
| 51       | Late         | Papillary serous      | IIIC              | 3            |
| 52       | Late         | Papillary serous      | IIIC              | 3            |
| 53       | Late         | Papillary serous      | IIIC              | 3            |
| 54       | Late         | Papillary serous      | IIIC              | 3            |
| 55       | Late         | Papillary serous      | IV                | 3            |
| 56       | Late         | Papillary serous      | IIIC              | 3            |
| 57       | Late         | Papillary serous      | IIIC              | 3            |
| 58       | Late         | Papillary serous      | -                 | 3            |
| 59       | Late         | Papillary serous      | IIIC              | 3            |
| 60       | Late         | Papillary serous      | IIIC              |              |

\*B: benign ovary; Early and Late: stage of the primary tumors; "cyst." means cystadenoma, a type of benign cyst of the ovary; "Grade" means grade of cell differentiation.

**Table S3.** Fresh-frozen tissue samples of the ovary for protein analysis.

| <b>N</b> | <b>Group</b> | <b>Type</b>         | <b>FIGO stage</b> | <b>Grade</b> |
|----------|--------------|---------------------|-------------------|--------------|
| 1        | B            | Simple serous cyst. | -                 | -            |
| 2        | B            | Simple serous cyst. | -                 | -            |
| 3        | B            | Simple serous cyst. | -                 | -            |
| 4        | B            | Fibroma             | -                 | -            |
| 5        | B            | Simple serous cyst. | -                 | -            |
| 6        | B            | Fibroma             | -                 | -            |
| 7        | T            | Papillary serous    | IV                | 3            |
| 8        | T            | Papillary serous    | IV                | 3            |
| 9        | T            | Papillary serous    | IIIC              | 3            |
| 10       | T            | Papillary serous    | IVB               | 3            |
| 11       | T            | Papillary serous    | IIIC              | 3            |
| 12       | T            | Papillary serous    | IIIA1             | 3            |
| 13       | T            | Papillary serous    | IIIB              | 3            |
| 14       | T            | Papillary serous    | IIIB              | 3            |

\*B: benign ovary; \*T: Primary tumor; "Cyst." means cystadenoma, a type of benign cyst of the ovary; "Grade" means grade of cell differentiation.

**Table S4.** FFPE paired tumor and metastases

| <b>Patient</b> | <b>Type</b>      | <b>FIGO</b> | <b>Grade</b> | <b>Tumor (Yes/No)</b> | <b>Metastasis (Yes/No)</b> |
|----------------|------------------|-------------|--------------|-----------------------|----------------------------|
| 1              | Papillary serous | IIIC        | 3            | Yes                   | Yes                        |
| 2              | Papillary serous | IIC         | 3            | Yes                   | Yes                        |
| 3              | Papillary serous | IIIC        | 3            | Yes                   | Yes                        |
| 4              | Papillary serous | IIIC        | 3            | Yes                   | Yes                        |
| 5              | Papillary serous | IIIC        | 3            | Yes                   | Yes                        |
| 6              | Papillary serous | IIIC        | 3            | Yes                   | Yes                        |
| 7              | Papillary serous | IIIC        | 3            | Yes                   | Yes                        |
| 8              | Papillary serous | IIIC        | 3            | Yes                   | Yes                        |
| 9              | Papillary serous | IIIC        | 3            | Yes                   | Yes                        |
| 10             | Papillary serous | NA          | NA           | Yes                   | Yes                        |
| 11             | Papillary serous | IIIC        | 3            | Yes                   | Yes                        |
| 12             | Papillary serous | IIIC        | 3            | Yes                   | Yes                        |
| 13             | Papillary serous | IV          | 3            | Yes                   | Yes                        |

NA: not available

**Table S5.** Patient-derived ascites from advanced stage OC

| <b># (Patient)</b> | <b>Type</b>      | <b>FIGO</b> | <b>Grade</b> | <b>Culture conditions</b>                                                                                                                                                                     |
|--------------------|------------------|-------------|--------------|-----------------------------------------------------------------------------------------------------------------------------------------------------------------------------------------------|
| VH-01              | Clear cell       | IIIC        | 3            |                                                                                                                                                                                               |
| VH-02              | Papillary serous | IIIC        | 3            |                                                                                                                                                                                               |
| VH-03              | Papillary serous | IIIA1       | 3            | Mix medium: mixture (1:1) of MCDB 105 and M-199 mediums (Biological Industries, Israel), with 15% FBS, 2 mM L-glutamine, 100 U/mL penicillin and 100 µg/mL streptomycin (Invitrogen, CA, USA) |
| VH-04              | Papillary serous | IIIC        | 3            |                                                                                                                                                                                               |
| VH-05              | Papillary serous | IIIC        | 3            |                                                                                                                                                                                               |
| VH-06              | Papillary serous | IIIC        | 3            |                                                                                                                                                                                               |

\*VH means Vall Hebron Hospital

**Table S6.** General characteristics of the used human ovarian cell lines

| Ovarian Cancer Cell Line                                                        | Tumor Type                                                    | Source                 | Growth properties                            | Medium                                                                                   |
|---------------------------------------------------------------------------------|---------------------------------------------------------------|------------------------|----------------------------------------------|------------------------------------------------------------------------------------------|
| TOV112                                                                          | High-grade Endometrioid Adenocarcinoma                        | Primary tumor          | Monolayer.<br><i>Morphology: epithelial</i>  | Mixt medium: mixture (1:1) of MCDB 105 and M-199 mediums (Biological Industries, Israel) |
| SKOV3                                                                           | Epithelial Ovarian Adenocarcinoma                             | Ascites                | Monolayer.<br><i>Morphology: mesenchimal</i> | McCoy's 5A (Biowest)                                                                     |
| OAW42                                                                           | Epithelial Ovarian Adenocarcinoma                             | Ascites                | Monolayer.<br><i>Morphology: mesenchimal</i> | DMEM High glucose (Biowest)                                                              |
| OAW28                                                                           | High Grade Serous Carcinoma                                   | Ascites                | Monolayer.<br><i>Morphology: epithelial</i>  | DMEM High glucose (Biowest)                                                              |
| 59M                                                                             | Endometrioid carcinoma of ovary (with clear cell components)  | Ascites                | Monolayer.<br><i>Morphology: mesenchimal</i> | DMEM High glucose (Biowest)                                                              |
| OVCAR4                                                                          | High Grade Serous Carcinoma                                   | Primary tumor          | Monolayer.<br><i>Morphology: epithelial</i>  | Mixt medium: mixture (1:1) of MCDB 105 and M-199 mediums (Biological Industries, Israel) |
| A2780p                                                                          | High-grade Endometrioid Adenocarcinoma                        | Primary tumor          | Monolayer.<br><i>Morphology: epithelial</i>  | RPMI (Biowest)                                                                           |
| A2780cis*                                                                       | High-grade Endometrioid Adenocarcinoma                        | Primary tumor          | Monolayer.<br><i>Morphology: epithelial</i>  | RPMI (Biowest)                                                                           |
| BIN-67                                                                          | Small cell carcinoma of the ovary hypercalcemic type (SCCOHT) | Primary tumor          | Monolayer.<br><i>Morphology: epithelial</i>  | 100 mL de DMEM F12 (Biowest) + 100 mL DMEM High Glucose (Biowest) + 50 mL de FBS         |
| IGROV-1                                                                         | High-grade Endometrioid Adenocarcinoma                        | Primary tumor          | Monolayer.<br><i>Morphology: epithelial</i>  | RPMI (Biowest)                                                                           |
| IOSE 503                                                                        | Immortalized Ovarian Surface Epithelium                       | Ovarian surface tissue | Monolayer.<br><i>Morphology: epithelial</i>  | Mixt medium: mixture (1:1) of MCDB 105 and M-199 mediums (Biological Industries, Israel) |
| IOSE 385                                                                        | Immortalized Ovarian Surface Epithelium                       | Ovarian surface tissue | Monolayer.<br><i>Morphology: epithelial</i>  | Mixt medium: mixture (1:1) of MCDB 105 and M-199 mediums (Biological Industries, Israel) |
| UWB1.289/BRCA1MUT                                                               | High Grade Serous Carcinoma                                   | Primary tumor          | Monolayer.<br><i>Morphology: mesenchymal</i> | 1 : 1 mixture of medium RPMI (Biowest)+ MEGM (FBS 3%)                                    |
| UWB1.289 + BRCA1                                                                | High Grade Serous Carcinoma                                   | Primary tumor          | Monolayer.<br><i>Morphology: mesenchymal</i> | 1 : 1 mixture of medium RPMI (Biowest) + MEGM (FBS 3%) + G418                            |
| Footnote: *Resistant OC cell line to cisplatin, derived from the parental A2780 |                                                               |                        |                                              |                                                                                          |

Table S7. List of antibodies used for Immunoblot and Immunohistochemistry

| Antibody          | Catalog number | Source                    | Application | Conditions                        |
|-------------------|----------------|---------------------------|-------------|-----------------------------------|
| Aurora A          | 610938         | BD Biosciences            | IB          | 1:1000 dilution, 5% nonfat milk   |
| Bcl-2             | M0887          | DAKO                      | IB          | 1:1000 dilution, 5% nonfat milk   |
| Bora              | #12109         | Cell Signaling            | IB          | 1:1000 dilution, 5% nonfat milk   |
| Caspase 3         | #9665          | Cell Signaling            | IB          | 1:1000 dilution, 5% BSA           |
| Caspase 3 Cleaved | #9661          | Cell Signaling            | IB          | 1:750 dilution, 5% BSA            |
| Cdk6              | #13331         | Cell Signaling            | IB          | 1:1000 dilution, 5% nonfat milk   |
| Cyclin B1         | #05-373        | Merk Millipore            | IB          | 1:1000 dilution, 5% nonfat milk   |
| JNK1              | #3708          | Cell Signaling            | IB          | 1:1000 dilution, 5% nonfat milk   |
| Ki67              | 790-4286       | Roche (Ventana Med.Syst.) | IHQ         | -                                 |
| mCherry           | 96752FR        | Novus Biologicals         | IB          | 1:1000 dilution, 5% nonfat milk   |
| PARP1             | #9542          | Cell Signaling            | IB          | 1:3000 dilution, 5% BSA           |
| Plk1              | #4535          | Cell Signaling            | IB          | 1:1000 dilution, 5% nonfat milk   |
| pTCTP (Ser46)     | #5251          | Cell Signaling            | IB          | 1:3000 dilution, 5% BSA           |
| p27 Kip1 (D69C12) | #3686          | Cell Signaling            | IB          | 1:1000 dilution, 5% nonfat milk   |
| p53               | sc-126         | Santa Cruz Biotechnology  | IB          | 1:1000 dilution, 5% nonfat milk   |
| p65               | #8242          | Cell Signaling            | IB          | 1:1000 dilution, 5% nonfat milk   |
| $\alpha$ -Tubulin | T9026          | Sigma Aldrich             | IB          | 1:5000 dilution, 5% nonfat milk   |
| $\beta$ -Actin    | sc-47778       | Santa Cruz Biotechnology  | IB          | 1:10.000 dilution, 5% nonfat milk |
| anti-Rabbit IgG   | A0545          | Sigma Aldrich             | IB          | 1:5000 dilution, 5% nonfat milk   |

anti-Mouse IgG

A9044

Sigma Aldrich

IB

1:5000 dilution, 5% nonfat milk; 1:10000 for  $\alpha$ -Tubulin

---

"IB" means Immunoblot; "IHQ" means Immunohistochemistry

**Figure 1L**

Table S8. Primer sequences for genes detected by Sybr-Green RTqPCR technology

| Gene Name | NM_number (GeneCards) | Catalog #   | Primer sequence (5'-3')                          | Amplicon length |
|-----------|-----------------------|-------------|--------------------------------------------------|-----------------|
| TPM1      | NM_001018004          | 4689011001  | ctctgaggctctcaaagatgc<br>cagctggatgcgtctgttc     | 104 nt          |
| SHROOM2   | NM_001649.3           | 4685016001  | gagggtcccggctctcacc<br>ctgccttcgcagttcgac        | 67 nt           |
| MMP7      | NM_002423.4           | 4685032001  | cggatggtagcagcttaggg<br>agggtggatacatcactgcattag | 111 nt          |
| CDK6      | NM_001145306.1        | 4684982001  | tgatcaactaggaaaaatcttgac<br>ggcaacatctctaggccagt | 70 nt           |
| BCL2      | NM_000633.2           | 4688988001  | agtacctgaaccggcacct<br>gccgtacagttccacaagg       | 74 nt           |
| MAD2L1    | NM_002358.3           | 4687655001  | cgcgtgctttgtttgtgt<br>gctgttgatgccgaatgag        | 117 nt          |
| SFRP1     | NM_003012.4           | 4687990001  | gctggagcacgagaccat<br>tggcagttcttgttgagca        | 75 nt           |
| CLASP2    | NM_001207044.1        | 4689089001  | cgaccaagtgtgagtcaagg<br>gatctggaatggtgtctggag    | 110 nt          |
| MARK2     | NM_017490.3           | 4685008001  | tggaagtgcgtgtagtcct<br>ccccgaatcatgttggac        | 95 nt           |
| SLC25A10  | NM_001270888.1        | 4688031001  | cccgcagacttggtcaac<br>tacgcggtacaggccatc         | 99 nt           |
| IL1B      | NM_000576.2           | 4689011001  | tacctgtcctgcgtgttgaa<br>tctttgggtaattttgggatct   | 76 nt           |
| RHOB      | NM_004040.3           | 4688589001  | gcatgaacaggacttgacca<br>ctgtgtcctcccaagtcag      | 71 nt           |
| RERG      | NM_032918.2           | 4689038001  | aacttgacaggaccgtagc<br>ttggaagagtcacaatcctg      | 64 nt           |
| GAPDH     | NM_002046             | 04689003001 | caacgaccactttgtcaagc<br>ggtggtccagggtcttact      | 115nt           |

The whole western blot images

Figure 1L

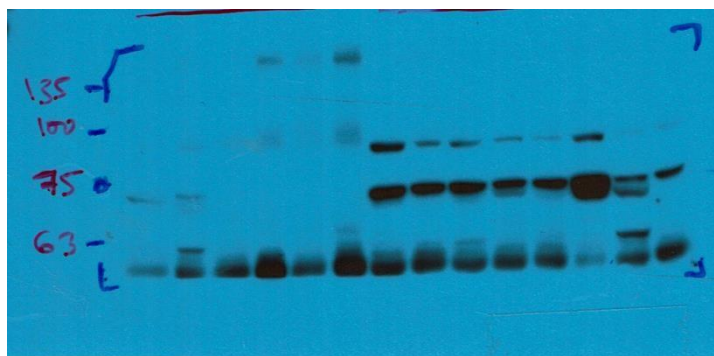

BORA

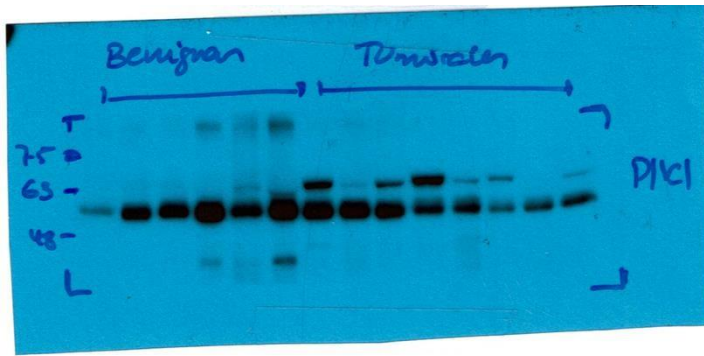

PLK1

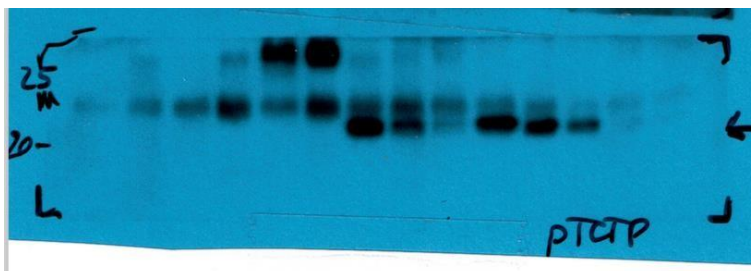

pTCTP (Ser46)

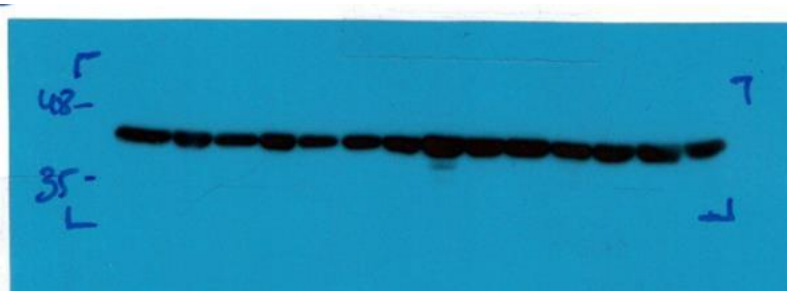

B-Actin

**Figure 1M**  
Figure 1M

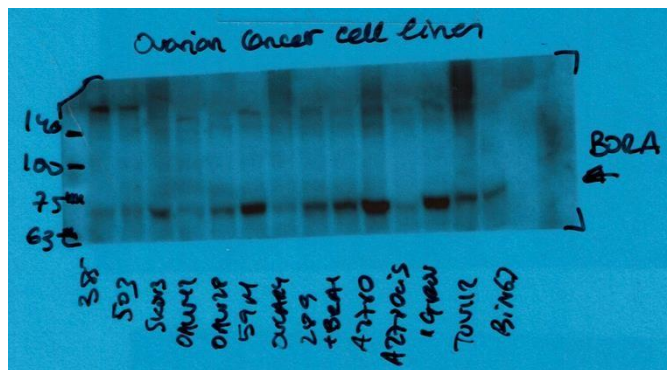

BORA

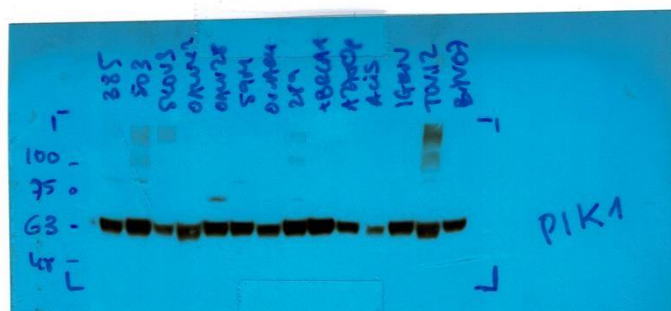

Plk1

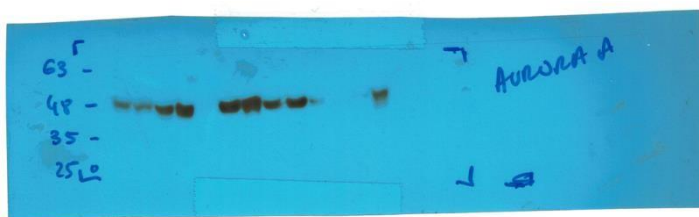

Aurora A

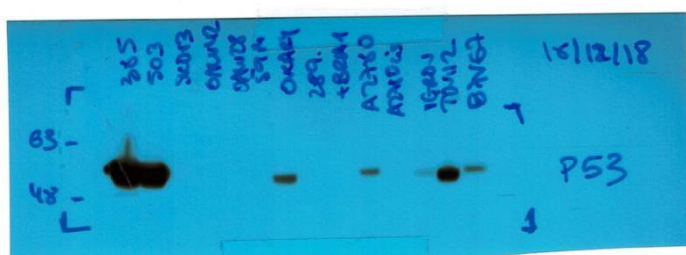

Figure 1M

p53

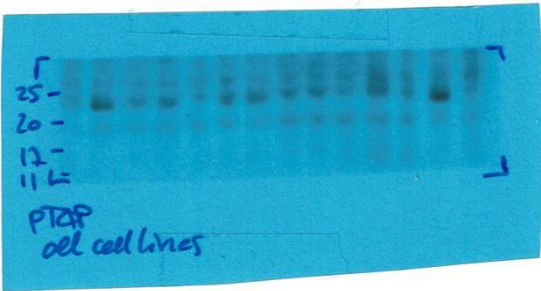

pTCTP (Ser46)

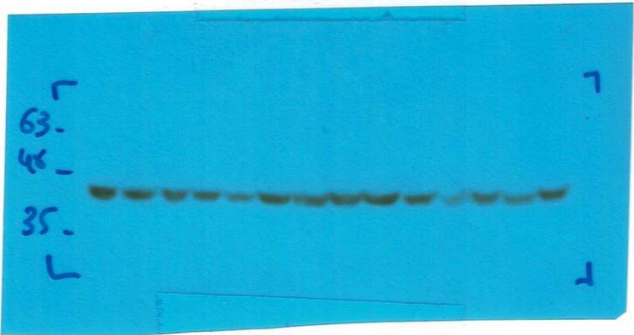

B-Actin

Figure 2A  
Figure 2A

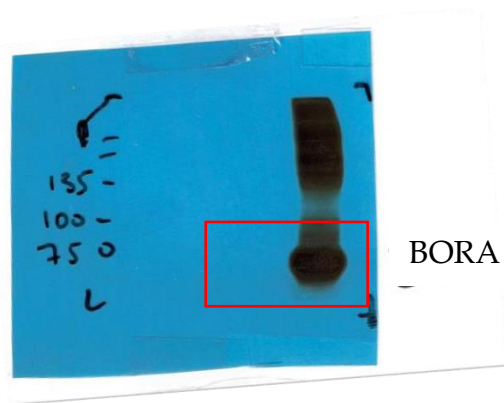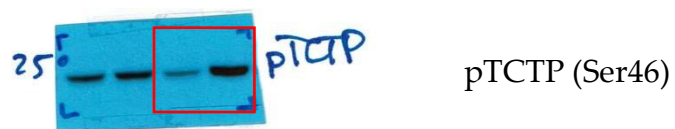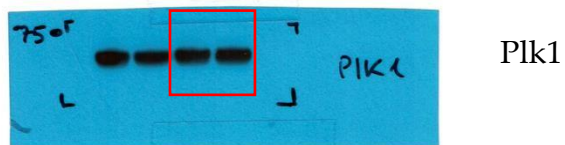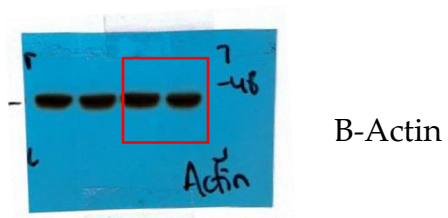

## Figure 2H

Figure 2H

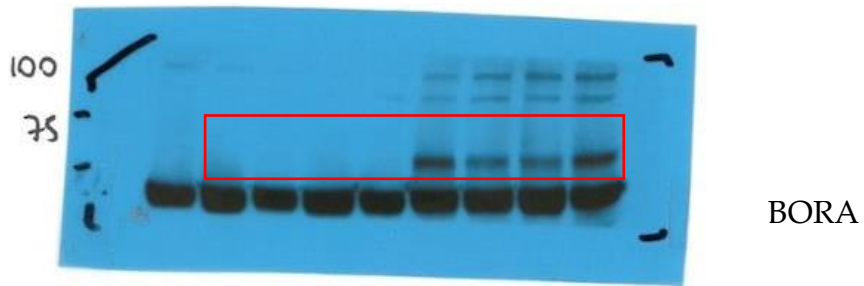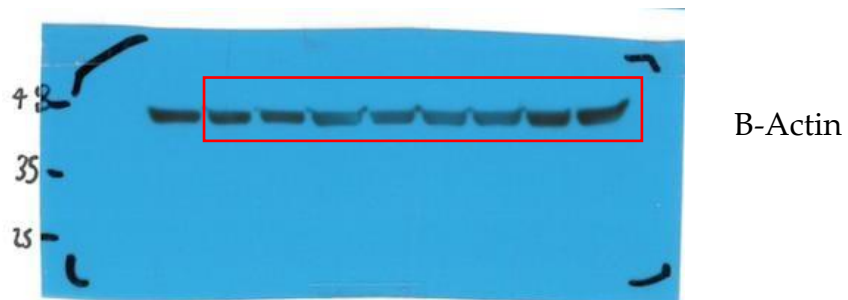

**Figure 3A**  
Figure 3A

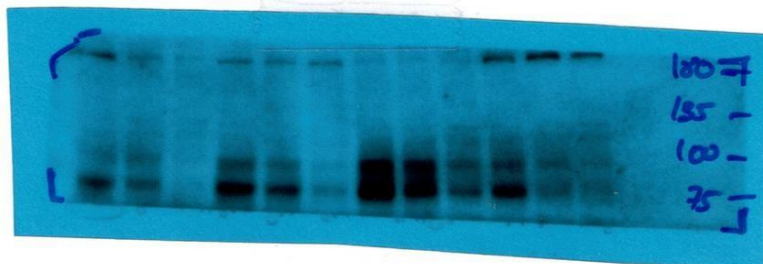

BORA

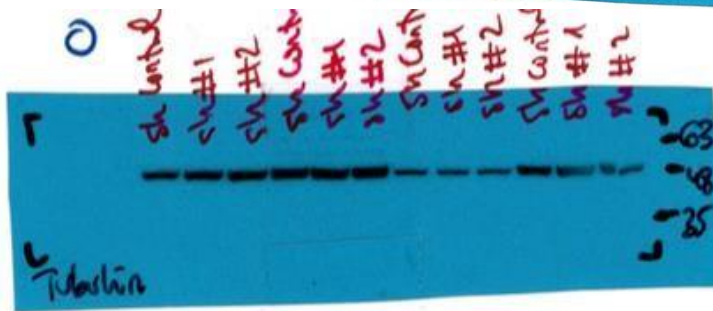

Tubulin

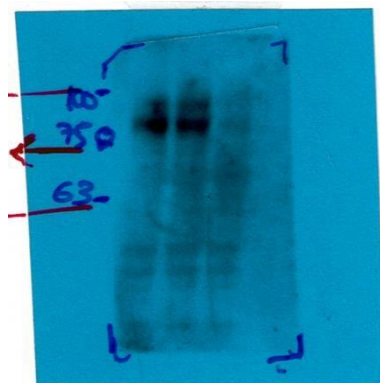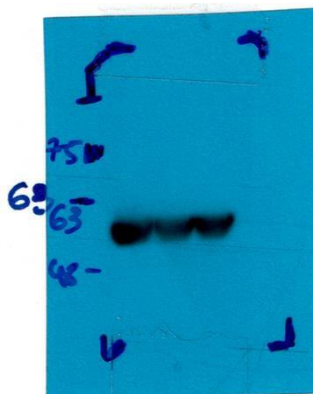

BORA

Figure 3A

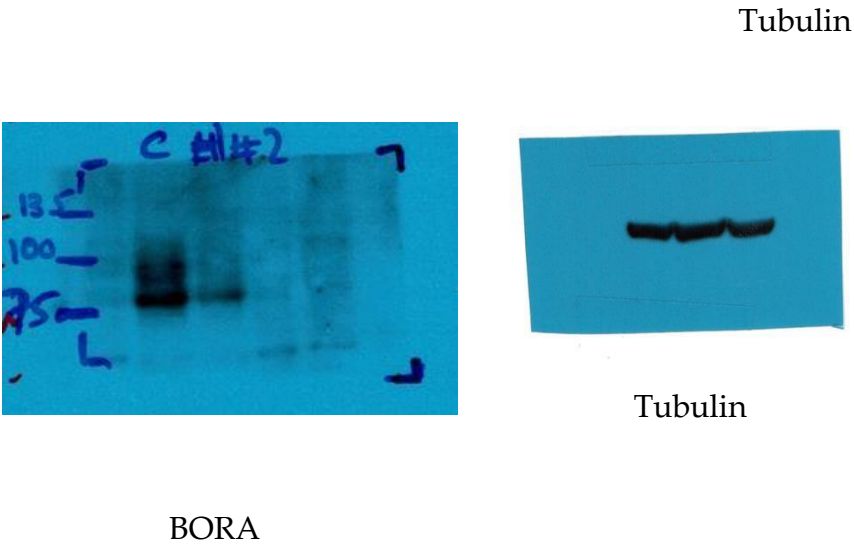

**FIGURE 3E**  
Figure 3E

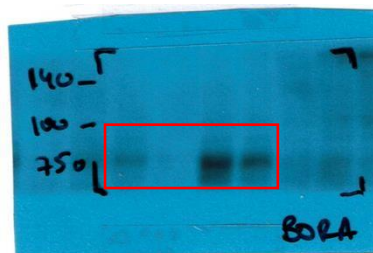

BORA

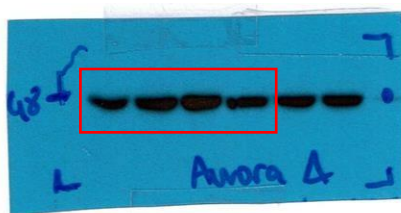

Aurora A

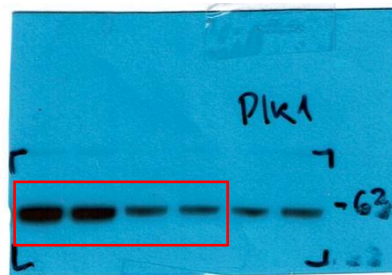

Plk1

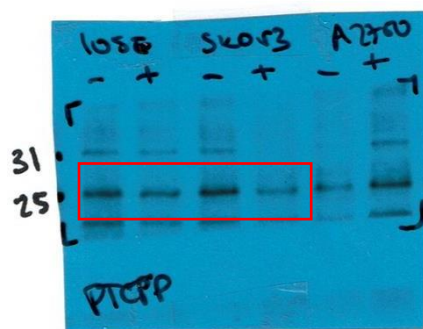

pTCTP (Ser46)

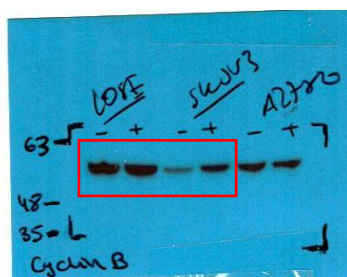

Cyclin B

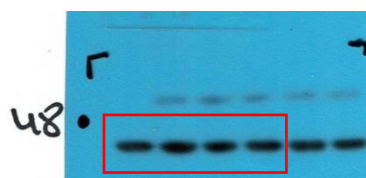

FIGURE 3E

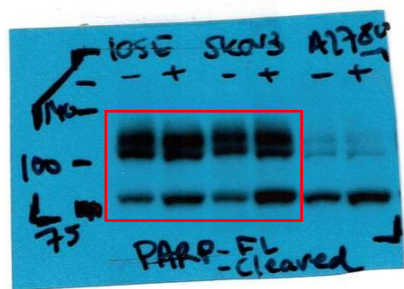

PARP-FL and cleaved

B-Actin

# FIGURE 4D

Figure 4D

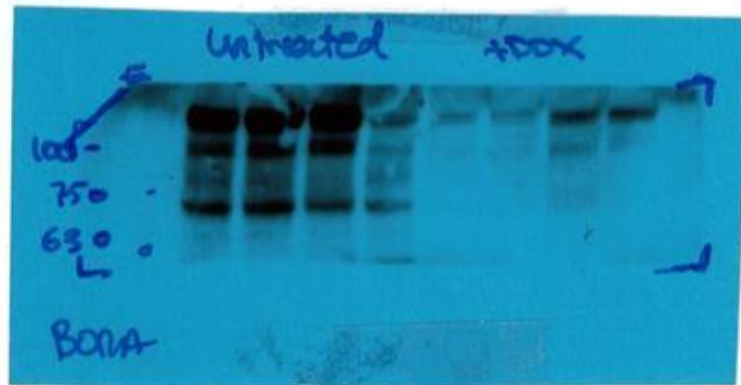

BORA

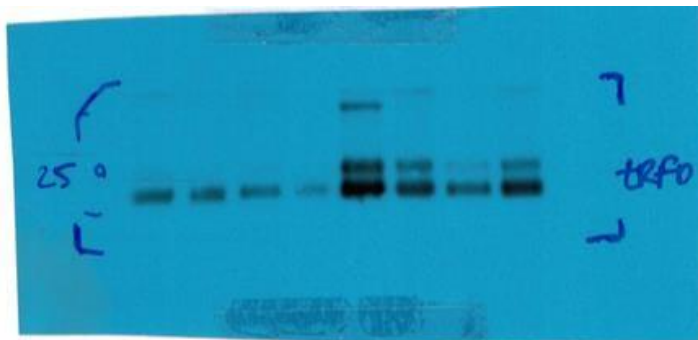

tRFP

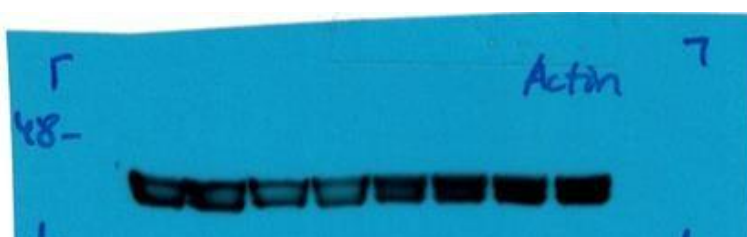

B-Actin

FIGURE 4I

Figure 4I

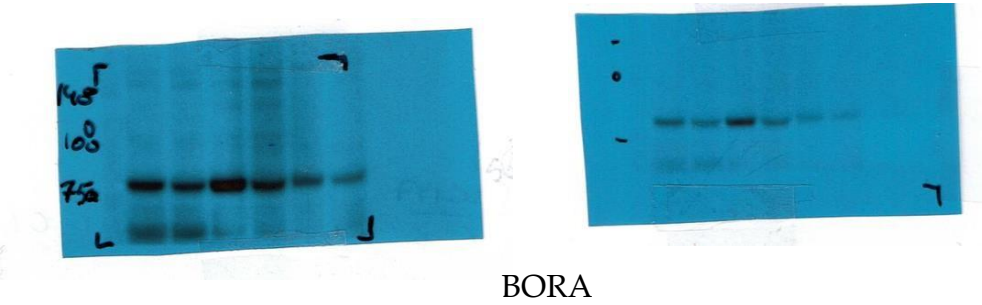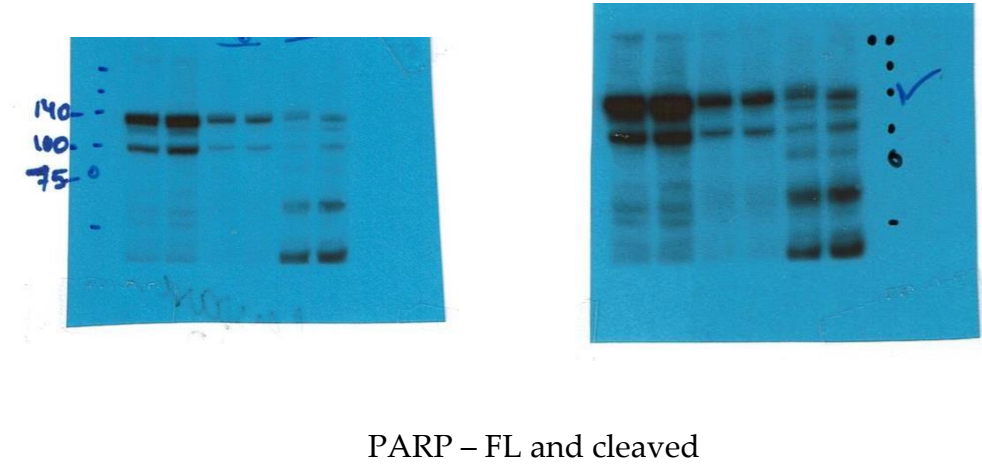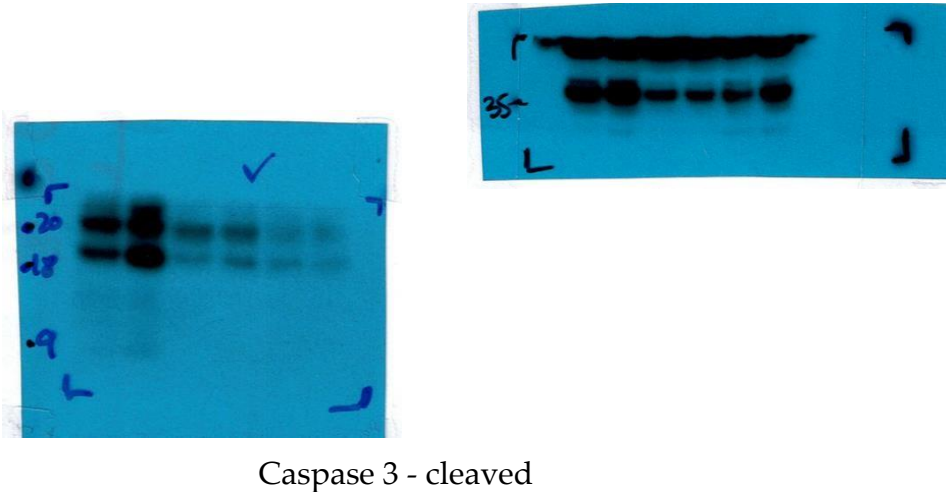

## **FIGURE 4I**

Caspase 3

**FIGURE 5H**

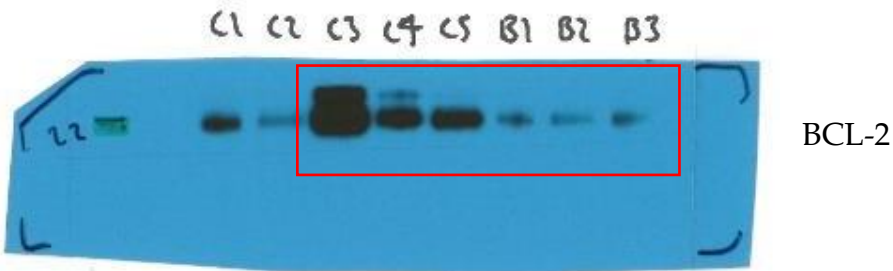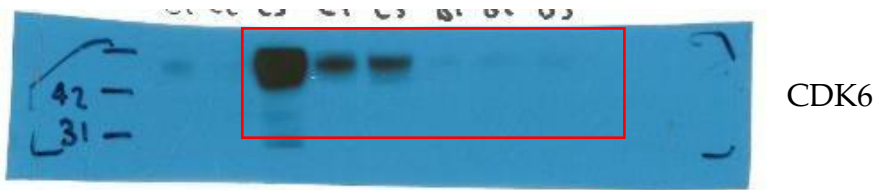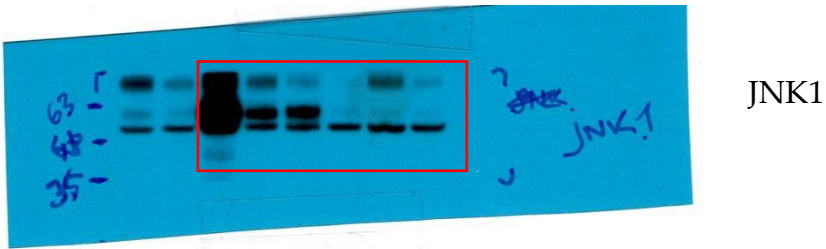

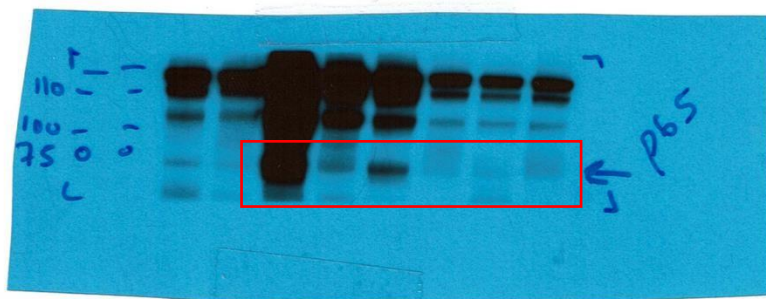

p65

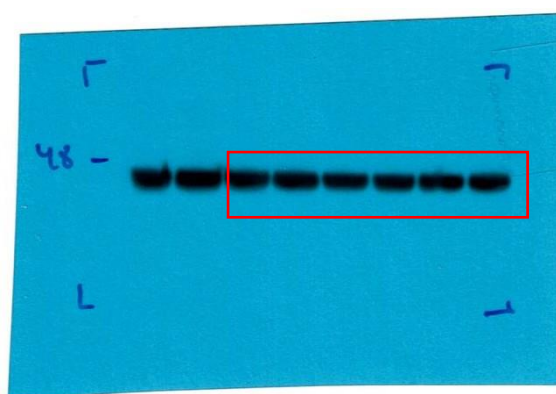

Actin

FIGURE 6E

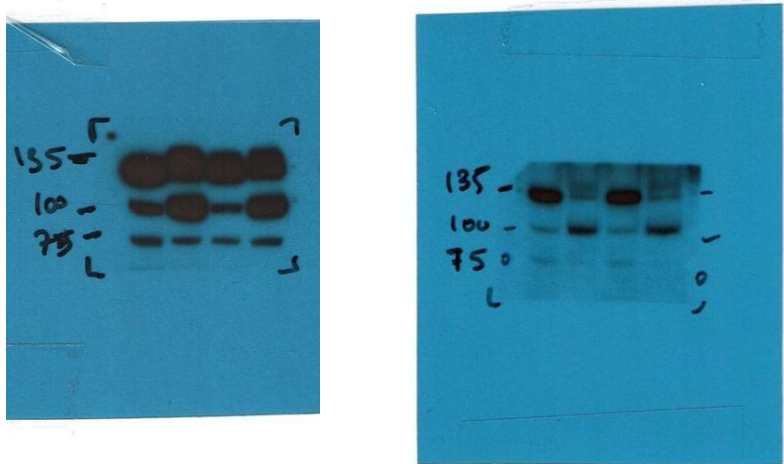

PARP FL y Cleaved

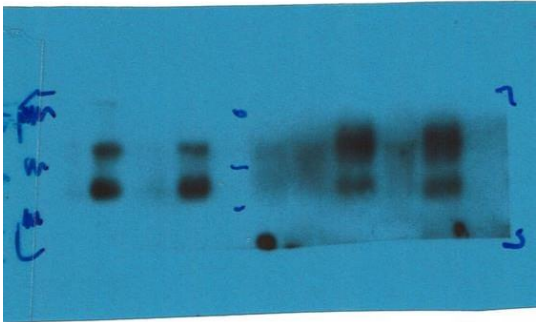

Caspase 3 cleaved

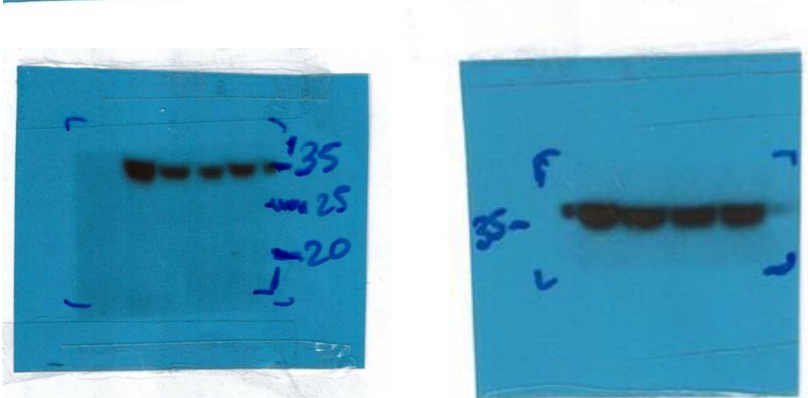

**FIGURE 6E**

Caspase 3

B-Actin

Supplemental Figure 4a

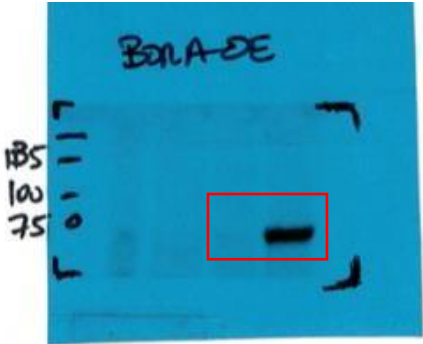

BORA

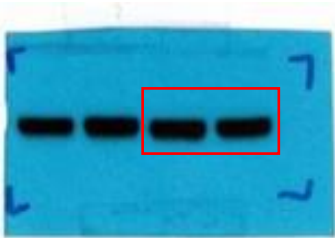

B-Actin

Supplemental Figure 5b

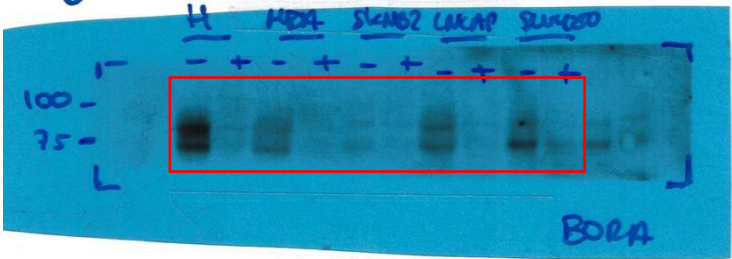

BORA

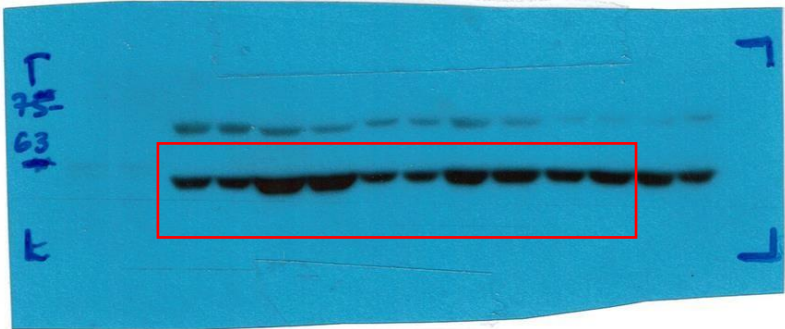

Tubulin

Supplemental Figure 5d

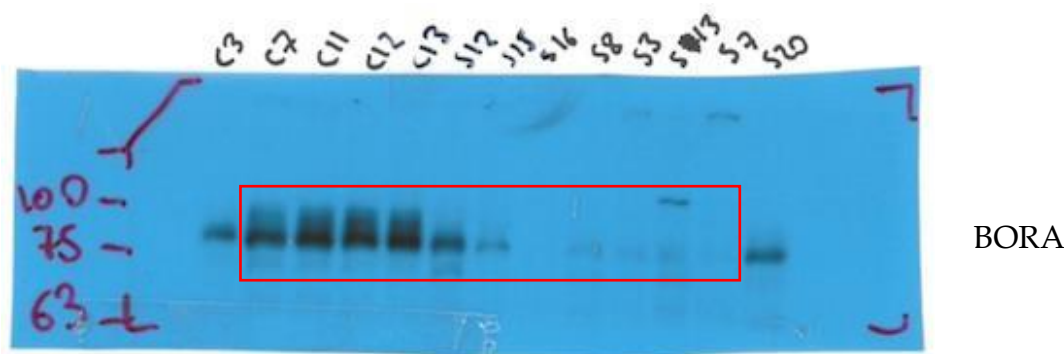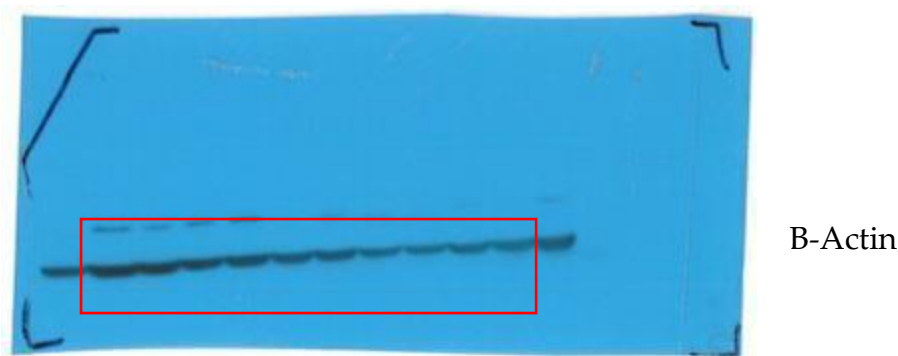

Supplemental Figure 5e

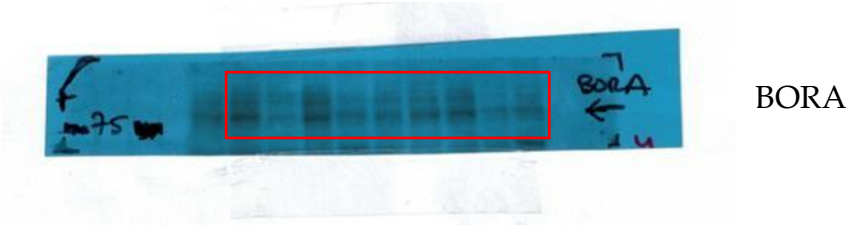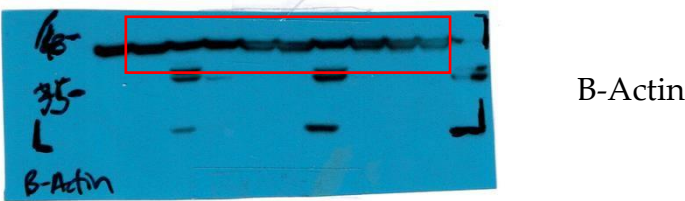

Supplemental Figure 6a

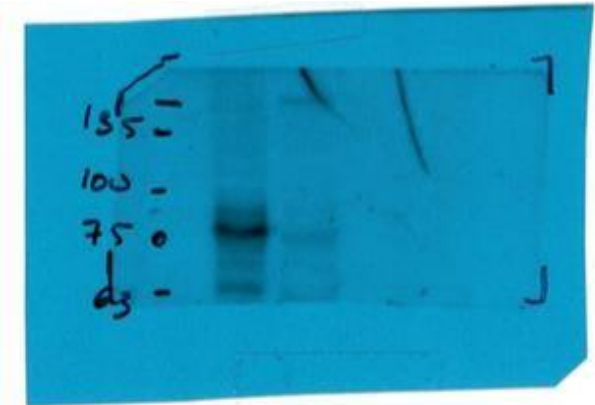

BORA

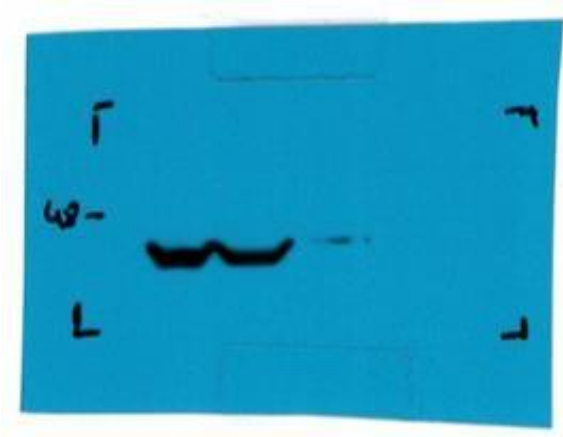

B-Actin

Supplemental Figure 6f

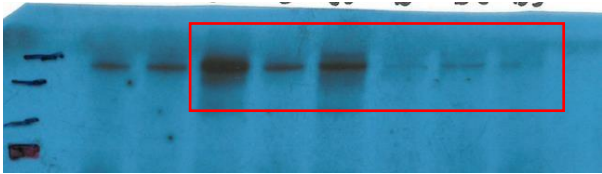

BORA

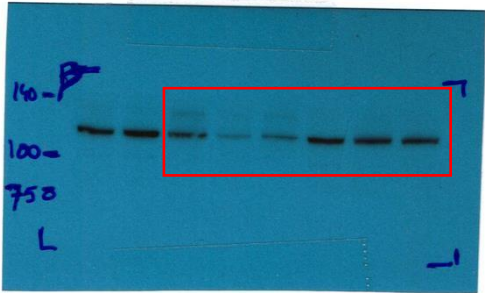

PARP-Full lenght

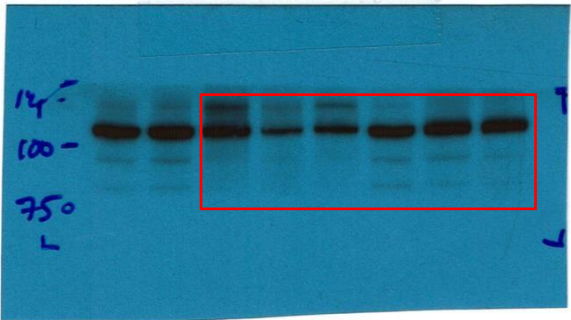

PARP-Cleaved

Supplemental Figure 6f

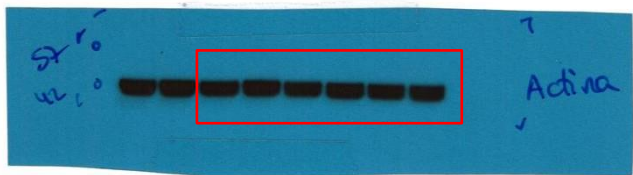

B-Actin

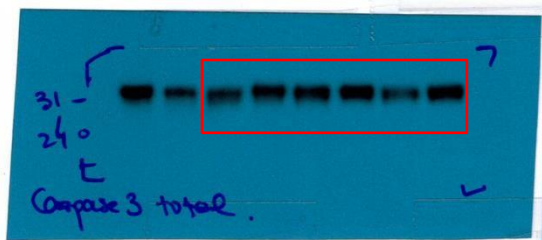

Caspase 3

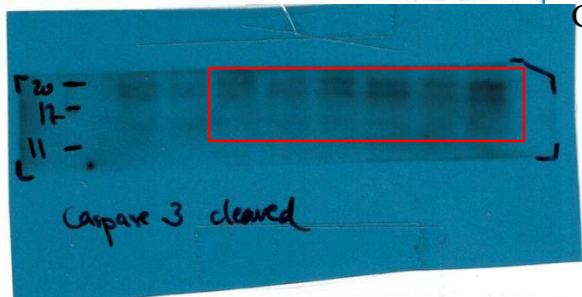

Caspase 3-Cleaved

Supplemental Figure 7b

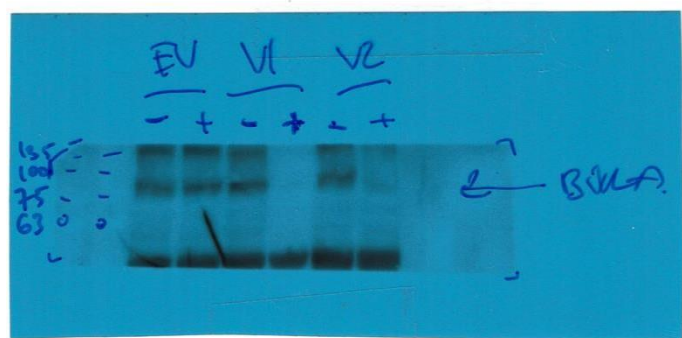

BORA

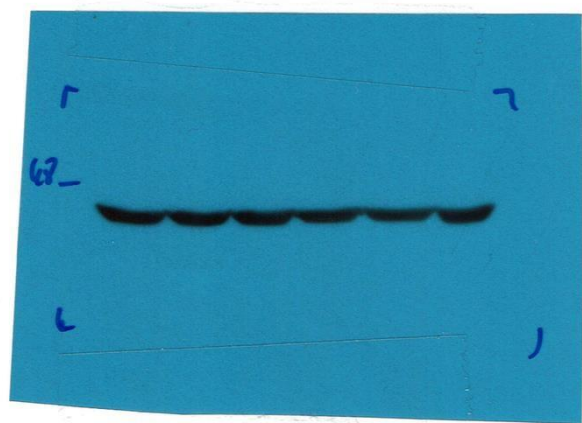

B-Actin

Supplemental Figure 8a

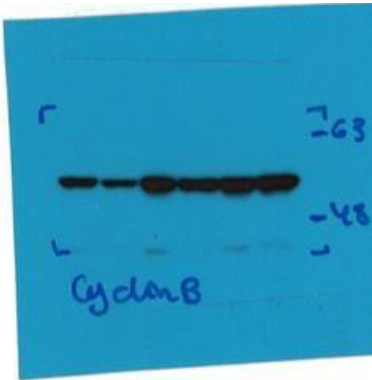

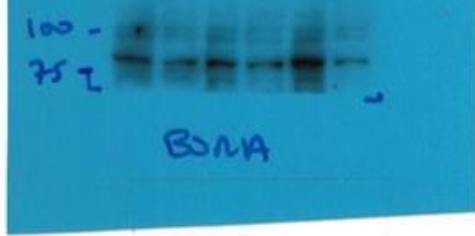

BORA

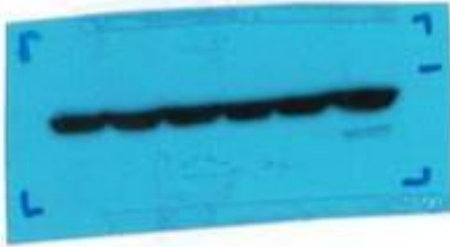

## Supplemental Figure 8a

B-Actin

Cyclin B  
Supplemental Figure 8a

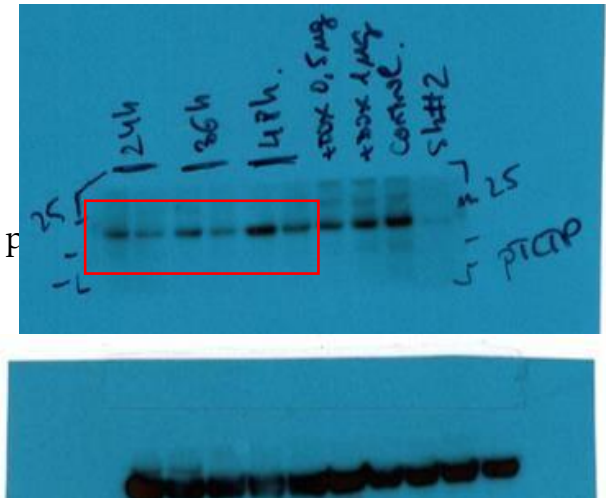

## Supplemental Figure 8a

B-Actin
